# Supplementary material for: Comprehensive understanding of multiple resonance thermally activated delayed fluorescence through quantum chemistry calculations
Source: PubMed Central journal article supplement (PMC9814892; doi:10.1038/s42004-022-00668-6), 2022-04-14
Supplement: 42004_2022_668_MOESM1_ESM.pdf [file 42004_2022_668_MOESM1_ESM.pdf]

*Supplementary Information for*

Comprehensive understanding of multiple resonance  
thermally activated delayed fluorescence through  
quantum chemistry calculations

*Katsuyuki Shizu<sup>1</sup> and Hironori Kaji<sup>1\*</sup>*

*Email: kaji@scl.kyoto-u.ac.jp*

<sup>1</sup>Institute for Chemical Research, Kyoto University, Uji, Kyoto 611-0011, Japan

## Supplementary methods

### Full geometry optimization and frequency analysis of $S_0$ of DABNA-1

The geometry of ground state,  $S_0$ , of DABNA-1 was optimized at the TPSSh/6-31+G(d) level of theory using the polarizable continuum model (PCM,  $\text{CH}_2\text{Cl}_2$ ) and then, its stability was examined using frequency analysis at the same level of theory. No imaginary modes were obtained, indicating that the optimized  $S_0$  geometry was stationary minima. The geometry optimization and frequency analysis were performed using the Gaussian 16 package.<sup>1</sup> Supplementary Table 1 lists the standard nuclear orientation.

### Full geometry optimization and frequency analysis of $S_1$ of DABNA-1

The geometry of  $S_1$  of DABNA-1 was optimized at the TD-TPSSh/6-31+G(d) level of theory using the polarizable continuum model (PCM,  $\text{CH}_2\text{Cl}_2$ ) and then, its stability was examined using frequency analysis at the same level of theory. No imaginary modes were obtained, indicating that the optimized  $S_1$  geometry was stationary minima. The geometry optimization and frequency analysis were performed using the Gaussian 16 package.<sup>1</sup> Supplementary Table 2 lists the standard nuclear orientation.

### Full geometry optimization and frequency analysis of $T_1$ of DABNA-1

The geometry of  $T_1$  of DABNA-1 was optimized at the TD-TPSSh/6-31+G(d) level of theory using the polarizable continuum model (PCM,  $\text{CH}_2\text{Cl}_2$ ) and then, its stability was examined using frequency analysis at the same level of theory. No imaginary modes were obtained, indicating that the optimized  $T_1$  geometry was stationary minima. The geometry optimization and frequency analysis were performed using the Gaussian 16 package.<sup>1</sup> Supplementary Table 3 lists the standard nuclear orientation.

### Full geometry optimization and frequency analysis of $T_2$ of DABNA-1

The geometry of  $T_2$  of DABNA-1 was optimized at the TD-TPSSh/6-31G+(d) level of theory using the polarizable continuum model (PCM,  $\text{CH}_2\text{Cl}_2$ ) and then, its stability was examined using frequency analysis at the same level of theory. No imaginary modes were obtained, indicating that the optimized  $T_2$  geometry was stationary minima. The geometry optimization and frequency analysis were performed using the Gaussian 16 package.<sup>1</sup> Supplementary Table 4 lists the standard nuclear orientation.

## Calculation of spin-orbit couplings

Spin-orbit couplings were calculated at the EOM-CCSD/6-31G level of theory using the Q-Chem program package.<sup>2</sup> For S<sub>1</sub>-T<sub>1</sub>, S<sub>1</sub>-T<sub>2</sub>, S<sub>1</sub>-T<sub>3</sub>, and S<sub>1</sub>-T<sub>4</sub> SOCs, we added the following key words in a Q-Chem input file.

```
$rem
METHOD      eom-ccsd
BASIS       6-31G
EE_SINGLETs [2,2]
EE_TRIPLETS [2,2]
GUI         2
Mem_Static  512000
Mem_Total   1000000
ao2mo_disk  1000000
CC_TRANS_PROP = true
CALC_SOC    = true
CC_STATE_TO_OPT = [2,1]
$end
```

For S<sub>0</sub>-T<sub>1</sub>, S<sub>0</sub>-T<sub>2</sub>, S<sub>0</sub>-T<sub>3</sub>, and S<sub>0</sub>-T<sub>4</sub> SOCs, we added the following key words in a Q-Chem input file.

```
$rem
METHOD      eom-ccsd
BASIS       6-31G
EE_SINGLETs [2,2]
EE_TRIPLETS [2,2]
GUI         2
Mem_Static  512000
Mem_Total   1000000
ao2mo_disk  1000000
CC_TRANS_PROP = true
CALC_SOC    = true
$end
```

## Mathematical formulae for rate constants

The rate constant for  $S_1 \rightarrow S_0$  fluorescence ( $k_F(S_1 \rightarrow S_0)$ ) can be written in terms of the  $S_1$ - $S_0$  adiabatic energy difference ( $\Delta E_{AD}(S_1-S_0)$ ),  $S_1$ - $S_0$  transition dipole moment ( $\mu_F(S_1-S_0)$ ), the vacuum electric permittivity ( $\epsilon_0$ ), the Dirac constant ( $\hbar$ ), and the speed of light ( $c$ ):

$$k_F = \frac{4\Delta E_{AD}(S_1 - S_0)^3}{3\epsilon_0 \hbar^4 c^3} \mu_F(S_1 - S_0)^2 \quad (S1)$$

The rate constant for  $T_n \rightarrow S_0$  ( $n \geq 1$ ) phosphorescence ( $k_{Phos}(T_n-S_0)$ ) can be written in terms of the adiabatic  $T_n$ - $S_0$  energy difference ( $\Delta E_{AD}(T_n-S_0)$ ) and  $T_n$ - $S_0$  transition dipole moment ( $\mu_{Phos}(T_n-S_0)$ ):

$$k_{Phos}(T_n-S_0) = \frac{4\Delta E_{AD}(T_n-S_0)^3}{3\epsilon_0 \hbar^4 c^3} \mu_{Phos}(T_n-S_0)^2 \quad (S2)$$

The rate constant for  $S_m-T_n$  ( $m \geq 0, n \geq 1$ ) intersystem crossing ( $k_{ISC}(S_m-T_n)$ ) can be written in terms of the adiabatic  $S_m$ - $T_n$  energy difference  $\Delta E_{AD}(S_m-T_n)$ , the norm of the  $S_m$ - $T_n$  spin-orbit coupling ( $|\text{SOC}(S_m-T_n)|$ ), and line shape function ( $\text{LSF}_{ISC}$ ):

$$k_{ISC}(S_m-T_n) = \frac{2\pi}{\hbar} |\text{SOC}(S_m-T_n)|^2 \times \text{LSF}_{ISC}(\Delta E_{AD}(S_m-T_n)) \quad (S3)$$

$$\text{LSF}_{ISC}(\Delta E_{AD}(S_m-T_n)) = \frac{1}{\pi} \frac{\gamma}{\Delta E_{AD}(S_m-T_n)^2 + \gamma^2} \quad (S4)$$

where  $\gamma$  is the broadening of  $\text{LSF}_{ISC}$ .  $\gamma$  was set to be  $600 \text{ cm}^{-1}$  (see Supplementary Figure 4). When the  $S_m \rightarrow T_n$  transition is an energy-downhill transition, the energy-downhill  $S_m \rightarrow T_n$  ISC rate constant is expressed as  $k_{ISC}(S_m-T_n)$ , whereas the energy-uphill  $T_n \rightarrow S_m$  rate constant is calculated as  $k_{ISC}(S_m-T_n) \exp\{-\beta \Delta E_{FC}(S_m-T_n)\}/3$ , where  $\beta$  is the inverse temperature ( $\beta^{-1} = k_B T$ , where  $k_B$  is the Boltzmann constant and  $T$  is the temperature). When the  $S_m \rightarrow T_n$  transition is an energy-uphill transition, the energy-downhill  $T_n \rightarrow S_m$  ISC rate constant is expressed as  $k_{ISC}(S_m-T_n)/3$ , whereas the energy-uphill  $S_m-T_n$  rate constant is calculated as  $k_{ISC}(S_m-T_n) \exp\{-\beta \Delta E_{FC}(S_m-T_n)\}$ .

The rate constant for  $S_m-S_n$  ( $m > n \geq 0, m \neq n$ ) internal conversion ( $k_{IC}(S_m-S_n)$ ) can be written in terms of the Franck-Condon  $S_m-S_n$  energy difference  $\Delta E_{FC}(S_m-S_n)$ , the adiabatic  $S_m-S_n$  energy difference  $\Delta E_{AD}(S_m-S_n)$ , the  $S_m-S_n$  vibronic coupling ( $V_\alpha(S_m-S_n)$ ), and line shape function ( $\text{LSF}_{IC}$ ):

$$k_{IC}(S_m-S_n) = \sum_{\alpha} k_{IC,\alpha}(S_m-S_n) \quad (S5)$$

$$k_{IC,\alpha}(S_m-S_n) = \frac{R_\alpha}{\hbar} \text{LSF}_{IC,\alpha} \quad (S6)$$

$$R_\alpha = \frac{\hbar^2 V_\alpha^2}{\Delta E_{FC}(S_m-S_n)^2} \quad (S7)$$

$$\text{LSF}_{\text{IC},\alpha} = 2\pi \sinh\left(\frac{1}{2}\beta\hbar\omega_\alpha\right) \sum_{v_\alpha} \exp\left\{-\left(\frac{1}{2} + v_\alpha\right)\beta\hbar\omega_\alpha\right\} \\ \times \frac{1}{\pi S} \left\{ \frac{v_\alpha\gamma}{\{\Delta E_{\text{AD}}(S_m-S_n) + \hbar\omega_\alpha\}^2 + \gamma^2} + \frac{(v_\alpha + 1)\gamma}{\{\Delta E_{\text{AD}}(S_m-S_n) - \hbar\omega_\alpha\}^2 + \gamma^2} \right\} \quad (\text{S8})$$

$$S = \frac{1}{4\pi\epsilon_0} \frac{e^2}{a_B hc} \quad (\text{S9})$$

where  $v_\alpha$  and  $\omega_\alpha$  are the vibrational quantum number and angular frequency for the  $\alpha^{\text{th}}$  vibrational mode, respectively,  $e$  is the elementary charge,  $a_B$  is the Bohr radius, and  $h$  is the Planck constant. The energy-downhill  $S_m \rightarrow S_n$  rate constant is calculated as  $k_{\text{IC}}(S_m-S_n)$ , whereas the energy-uphill  $S_n \rightarrow S_m$  rate constant is calculated as  $k_{\text{IC}}(S_m-S_n)\exp\{-\beta\Delta E_{\text{FC}}(S_m-S_n)\}$ .

The rate constant for  $T_m \rightarrow T_n$  ( $m > n \geq 1$ ,  $m \neq n$ ) internal conversion ( $k_{\text{IC}}(T_m \rightarrow T_n)$ ) can be calculated in a way similar to that for  $k_{\text{IC}}(S_m-S_n)$ .

**Supplementary Table 1.** Standard nuclear orientation of S<sub>0</sub> geometry of DABNA-1 optimized at the TPSSh/6-31+G(d) level of theory (PCM: dichloromethane).

| Atom | Element | x (Å)     | y (Å)     | z (Å)     |
|------|---------|-----------|-----------|-----------|
| 1    | C       | 0.535385  | -3.982201 | -3.098962 |
| 2    | C       | 0.291123  | -3.836493 | -1.739293 |
| 3    | C       | 0.167113  | -2.547190 | -1.165355 |
| 4    | C       | -0.224781 | 1.383157  | -1.991430 |
| 5    | C       | 0.516824  | -1.591686 | -3.362905 |
| 6    | C       | 0.676432  | -2.854038 | -3.922739 |
| 7    | N       | 0.000000  | 2.440606  | 0.225242  |
| 8    | C       | 0.002131  | 1.224897  | 0.922006  |
| 9    | C       | 0.000000  | 0.000000  | 0.190145  |
| 10   | B       | 0.000000  | 0.000000  | -1.328485 |
| 11   | C       | -0.002131 | -1.224897 | 0.922006  |
| 12   | N       | 0.000000  | -2.440606 | 0.225242  |
| 13   | C       | -0.167113 | 2.547190  | -1.165355 |
| 14   | C       | 0.224781  | -1.383157 | -1.991430 |
| 15   | C       | -0.291123 | 3.836493  | -1.739293 |
| 16   | C       | -0.535385 | 3.982201  | -3.098962 |
| 17   | C       | -0.676432 | 2.854038  | -3.922739 |
| 18   | C       | -0.516824 | 1.591686  | -3.362905 |
| 19   | C       | 0.016266  | 1.221955  | 2.330130  |
| 20   | C       | 0.000000  | 0.000000  | 3.001993  |
| 21   | C       | -0.016266 | -1.221955 | 2.330130  |
| 22   | C       | 0.098543  | 3.657149  | 0.999736  |
| 23   | C       | -0.098543 | -3.657149 | 0.999736  |
| 24   | C       | -1.061915 | 4.277118  | 1.476075  |
| 25   | C       | -0.958171 | 5.452664  | 2.226917  |
| 26   | C       | 0.300090  | 6.003261  | 2.499744  |
| 27   | C       | 1.456862  | 5.377048  | 2.020697  |
| 28   | C       | 1.358434  | 4.200872  | 1.269176  |
| 29   | C       | 1.061915  | -4.277118 | 1.476075  |
| 30   | C       | 0.958171  | -5.452664 | 2.226917  |
| 31   | C       | -0.300090 | -6.003261 | 2.499744  |
| 32   | C       | -1.456862 | -5.377048 | 2.020697  |
| 33   | C       | -1.358434 | -4.200872 | 1.269176  |
| 34   | H       | 0.635973  | -4.981949 | -3.514150 |
| 35   | H       | 0.214001  | -4.721567 | -1.118244 |
| 36   | H       | 0.647283  | -0.725438 | -4.002707 |
| 37   | H       | 0.905128  | -2.965802 | -4.979151 |
| 38   | H       | -0.214001 | 4.721567  | -1.118244 |
| 39   | H       | -0.635973 | 4.981949  | -3.514150 |
| 40   | H       | -0.905128 | 2.965802  | -4.979151 |
| 41   | H       | -0.647283 | 0.725438  | -4.002707 |

|    |   |           |           |          |
|----|---|-----------|-----------|----------|
| 42 | H | 0.026773  | 2.146161  | 2.895102 |
| 43 | H | 0.000000  | 0.000000  | 4.089274 |
| 44 | H | -0.026773 | -2.146161 | 2.895102 |
| 45 | H | -2.032007 | 3.839418  | 1.257418 |
| 46 | H | -1.857920 | 5.936264  | 2.597296 |
| 47 | H | 0.378440  | 6.916595  | 3.083057 |
| 48 | H | 2.434726  | 5.801708  | 2.230498 |
| 49 | H | 2.247945  | 3.704286  | 0.891554 |
| 50 | H | 2.032007  | -3.839418 | 1.257418 |
| 51 | H | 1.857920  | -5.936264 | 2.597296 |
| 52 | H | -0.378440 | -6.916595 | 3.083057 |
| 53 | H | -2.434726 | -5.801708 | 2.230498 |
| 54 | H | -2.247945 | -3.704286 | 0.891554 |

---

**Supplementary Table 2.** Standard nuclear orientation of S<sub>1</sub> geometry of DABNA-1 optimized at the TD-TPSSH/6-31+G(d) level of theory (PCM: dichloromethane).

| Atom | Element | x (Å)     | y (Å)     | z (Å)     |
|------|---------|-----------|-----------|-----------|
| 1    | C       | 0.348176  | -4.054431 | -3.103502 |
| 2    | C       | 0.189590  | -3.858486 | -1.721211 |
| 3    | C       | 0.113186  | -2.559776 | -1.186544 |
| 4    | C       | -0.152932 | 1.390306  | -2.025884 |
| 5    | C       | 0.355077  | -1.652816 | -3.411572 |
| 6    | C       | 0.448567  | -2.942487 | -3.944181 |
| 7    | N       | 0.000000  | 2.423100  | 0.224458  |
| 8    | C       | 0.005112  | 1.205271  | 0.897972  |
| 9    | C       | 0.000000  | 0.000000  | 0.164056  |
| 10   | B       | 0.000000  | 0.000000  | -1.376141 |
| 11   | C       | -0.005112 | -1.205271 | 0.897972  |
| 12   | N       | 0.000000  | -2.423100 | 0.224458  |
| 13   | C       | -0.113186 | 2.559776  | -1.186544 |
| 14   | C       | 0.152932  | -1.390306 | -2.025884 |
| 15   | C       | -0.189590 | 3.858486  | -1.721211 |
| 16   | C       | -0.348176 | 4.054431  | -3.103502 |
| 17   | C       | -0.448567 | 2.942487  | -3.944181 |
| 18   | C       | -0.355077 | 1.652816  | -3.411572 |
| 19   | C       | 0.014664  | 1.208646  | 2.326555  |
| 20   | C       | 0.000000  | 0.000000  | 3.019239  |
| 21   | C       | -0.014664 | -1.208646 | 2.326555  |
| 22   | C       | 0.057727  | 3.636435  | 1.012495  |
| 23   | C       | -0.057727 | -3.636435 | 1.012495  |
| 24   | C       | -1.127721 | 4.234414  | 1.452668  |
| 25   | C       | -1.063530 | 5.401485  | 2.221041  |
| 26   | C       | 0.177652  | 5.965114  | 2.541196  |
| 27   | C       | 1.358120  | 5.361294  | 2.092590  |
| 28   | C       | 1.301818  | 4.193467  | 1.323783  |
| 29   | C       | 1.127721  | -4.234414 | 1.452668  |
| 30   | C       | 1.063530  | -5.401485 | 2.221041  |
| 31   | C       | -0.177652 | -5.965114 | 2.541196  |
| 32   | C       | -1.358120 | -5.361294 | 2.092590  |
| 33   | C       | -1.301818 | -4.193467 | 1.323783  |
| 34   | H       | 0.403388  | -5.064520 | -3.499712 |
| 35   | H       | 0.134707  | -4.724030 | -1.071486 |
| 36   | H       | 0.464601  | -0.814750 | -4.089956 |
| 37   | H       | 0.597612  | -3.075006 | -5.013583 |
| 38   | H       | -0.134707 | 4.724030  | -1.071486 |
| 39   | H       | -0.403388 | 5.064520  | -3.499712 |
| 40   | H       | -0.597612 | 3.075006  | -5.013583 |
| 41   | H       | -0.464601 | 0.814750  | -4.089956 |



|    |   |           |           |          |
|----|---|-----------|-----------|----------|
| 42 | H | 0.029006  | 2.141104  | 2.876925 |
| 43 | H | 0.000000  | 0.000000  | 4.104379 |
| 44 | H | -0.029006 | -2.141104 | 2.876925 |
| 45 | H | -2.083462 | 3.786415  | 1.195837 |
| 46 | H | -1.981362 | 5.866815  | 2.569373 |
| 47 | H | 0.224381  | 6.871268  | 3.138699 |
| 48 | H | 2.322668  | 5.795385  | 2.340530 |
| 49 | H | 2.209401  | 3.714125  | 0.968024 |
| 50 | H | 2.083462  | -3.786415 | 1.195837 |
| 51 | H | 1.981362  | -5.866815 | 2.569373 |
| 52 | H | -0.224381 | -6.871268 | 3.138699 |
| 53 | H | -2.322668 | -5.795385 | 2.340530 |
| 54 | H | -2.209401 | -3.714125 | 0.968024 |

---

**Supplementary Table 3.** Standard nuclear orientation of T<sub>1</sub> geometry of DABNA-1 optimized at the TD-TPSSH/6-31+G(d) level of theory (PCM: dichloromethane).

| Atom | Element | x (Å)     | y (Å)     | z (Å)     |
|------|---------|-----------|-----------|-----------|
| 1    | C       | 0.353545  | -4.056793 | -3.102006 |
| 2    | C       | 0.193557  | -3.862969 | -1.723284 |
| 3    | C       | 0.113124  | -2.563171 | -1.184438 |
| 4    | C       | -0.150451 | 1.392265  | -2.023385 |
| 5    | C       | 0.353082  | -1.653749 | -3.406397 |
| 6    | C       | 0.451389  | -2.942208 | -3.940471 |
| 7    | N       | 0.000000  | 2.431273  | 0.220845  |
| 8    | C       | 0.002072  | 1.206838  | 0.901081  |
| 9    | C       | 0.000000  | 0.000000  | 0.154521  |
| 10   | B       | 0.000000  | 0.000000  | -1.368657 |
| 11   | C       | -0.002072 | -1.206838 | 0.901081  |
| 12   | N       | 0.000000  | -2.431273 | 0.220845  |
| 13   | C       | -0.113124 | 2.563171  | -1.184438 |
| 14   | C       | 0.150451  | -1.392265 | -2.023385 |
| 15   | C       | -0.193557 | 3.862969  | -1.723284 |
| 16   | C       | -0.353545 | 4.056793  | -3.102006 |
| 17   | C       | -0.451389 | 2.942208  | -3.940471 |
| 18   | C       | -0.353082 | 1.653749  | -3.406397 |
| 19   | C       | 0.009147  | 1.208648  | 2.319466  |
| 20   | C       | 0.000000  | 0.000000  | 3.020114  |
| 21   | C       | -0.009147 | -1.208648 | 2.319466  |
| 22   | C       | 0.065902  | 3.642797  | 1.011325  |
| 23   | C       | -0.065902 | -3.642797 | 1.011325  |
| 24   | C       | -1.114770 | 4.245264  | 1.457714  |
| 25   | C       | -1.042001 | 5.412309  | 2.225025  |
| 26   | C       | 0.202931  | 5.970267  | 2.540060  |
| 27   | C       | 1.378698  | 5.360261  | 2.087399  |
| 28   | C       | 1.313819  | 4.192475  | 1.319721  |
| 29   | C       | 1.114770  | -4.245264 | 1.457714  |
| 30   | C       | 1.042001  | -5.412309 | 2.225025  |
| 31   | C       | -0.202931 | -5.970267 | 2.540060  |
| 32   | C       | -1.378698 | -5.360261 | 2.087399  |
| 33   | C       | -1.313819 | -4.192475 | 1.319721  |
| 34   | H       | 0.412620  | -5.065755 | -3.500169 |
| 35   | H       | 0.140653  | -4.728665 | -1.073540 |
| 36   | H       | 0.458316  | -0.815944 | -4.085662 |
| 37   | H       | 0.601962  | -3.072424 | -5.009860 |
| 38   | H       | -0.140653 | 4.728665  | -1.073540 |
| 39   | H       | -0.412620 | 5.065755  | -3.500169 |
| 40   | H       | -0.601962 | 3.072424  | -5.009860 |
| 41   | H       | -0.458316 | 0.815944  | -4.085662 |

|    |   |           |           |          |
|----|---|-----------|-----------|----------|
| 42 | H | 0.019271  | 2.142253  | 2.869145 |
| 43 | H | 0.000000  | 0.000000  | 4.104897 |
| 44 | H | -0.019271 | -2.142253 | 2.869145 |
| 45 | H | -2.073721 | 3.802047  | 1.204757 |
| 46 | H | -1.956306 | 5.882706  | 2.575743 |
| 47 | H | 0.256293  | 6.876861  | 3.136296 |
| 48 | H | 2.346251  | 5.790137  | 2.330831 |
| 49 | H | 2.217783  | 3.708615  | 0.960968 |
| 50 | H | 2.073721  | -3.802047 | 1.204757 |
| 51 | H | 1.956306  | -5.882706 | 2.575743 |
| 52 | H | -0.256293 | -6.876861 | 3.136296 |
| 53 | H | -2.346251 | -5.790137 | 2.330831 |
| 54 | H | -2.217783 | -3.708615 | 0.960968 |

---

**Supplementary Table 4.** Standard nuclear orientation of T<sub>2</sub> geometry of DABNA-1 optimized at the TD-TPSSH/6-31+G(d) level of theory (PCM: dichloromethane).

| Atom | Element | x (Å)     | y (Å)     | z (Å)     |
|------|---------|-----------|-----------|-----------|
| 1    | C       | 0.432319  | -4.024599 | -3.127583 |
| 2    | C       | 0.225134  | -3.846008 | -1.737094 |
| 3    | C       | 0.141616  | -2.544298 | -1.175309 |
| 4    | C       | -0.200227 | 1.380404  | -2.002691 |
| 5    | C       | 0.457614  | -1.616633 | -3.382798 |
| 6    | C       | 0.567655  | -2.915017 | -3.944782 |
| 7    | N       | 0.000000  | 2.434548  | 0.217122  |
| 8    | C       | 0.000163  | 1.218501  | 0.935275  |
| 9    | C       | 0.000000  | 0.000000  | 0.194704  |
| 10   | B       | 0.000000  | 0.000000  | -1.344383 |
| 11   | C       | -0.000163 | -1.218501 | 0.935275  |
| 12   | N       | 0.000000  | -2.434548 | 0.217122  |
| 13   | C       | -0.141616 | 2.544298  | -1.175309 |
| 14   | C       | 0.200227  | -1.380404 | -2.002691 |
| 15   | C       | -0.225134 | 3.846008  | -1.737094 |
| 16   | C       | -0.432319 | 4.024599  | -3.127583 |
| 17   | C       | -0.567655 | 2.915017  | -3.944782 |
| 18   | C       | -0.457614 | 1.616633  | -3.382798 |
| 19   | C       | 0.005143  | 1.220688  | 2.342321  |
| 20   | C       | 0.000000  | 0.000000  | 3.023051  |
| 21   | C       | -0.005143 | -1.220688 | 2.342321  |
| 22   | C       | 0.071632  | 3.649948  | 0.997756  |
| 23   | C       | -0.071632 | -3.649948 | 0.997756  |
| 24   | C       | -1.105516 | 4.260899  | 1.442558  |
| 25   | C       | -1.026885 | 5.430486  | 2.205616  |
| 26   | C       | 0.221030  | 5.980677  | 2.522613  |
| 27   | C       | 1.393598  | 5.360486  | 2.075479  |
| 28   | C       | 1.322315  | 4.190336  | 1.311691  |
| 29   | C       | 1.105516  | -4.260899 | 1.442558  |
| 30   | C       | 1.026885  | -5.430486 | 2.205616  |
| 31   | C       | -0.221030 | -5.980677 | 2.522613  |
| 32   | C       | -1.393598 | -5.360486 | 2.075479  |
| 33   | C       | -1.322315 | -4.190336 | 1.311691  |
| 34   | H       | 0.492570  | -5.032338 | -3.528628 |
| 35   | H       | 0.131041  | -4.721017 | -1.105074 |
| 36   | H       | 0.612066  | -0.765707 | -4.037427 |
| 37   | H       | 0.754744  | -3.027513 | -5.009693 |
| 38   | H       | -0.131041 | 4.721017  | -1.105074 |
| 39   | H       | -0.492570 | 5.032338  | -3.528628 |
| 40   | H       | -0.754744 | 3.027513  | -5.009693 |
| 41   | H       | -0.612066 | 0.765707  | -4.037427 |

|    |   |           |           |          |
|----|---|-----------|-----------|----------|
| 42 | H | 0.007289  | 2.147943  | 2.902601 |
| 43 | H | 0.000000  | 0.000000  | 4.109688 |
| 44 | H | -0.007289 | -2.147943 | 2.902601 |
| 45 | H | -2.066928 | 3.822691  | 1.190174 |
| 46 | H | -1.938914 | 5.909772  | 2.550401 |
| 47 | H | 0.279152  | 6.889420  | 3.115211 |
| 48 | H | 2.363502  | 5.785512  | 2.318386 |
| 49 | H | 2.223930  | 3.697845  | 0.958736 |
| 50 | H | 2.066928  | -3.822691 | 1.190174 |
| 51 | H | 1.938914  | -5.909772 | 2.550401 |
| 52 | H | -0.279152 | -6.889420 | 3.115211 |
| 53 | H | -2.363502 | -5.785512 | 2.318386 |
| 54 | H | -2.223930 | -3.697845 | 0.958736 |

---

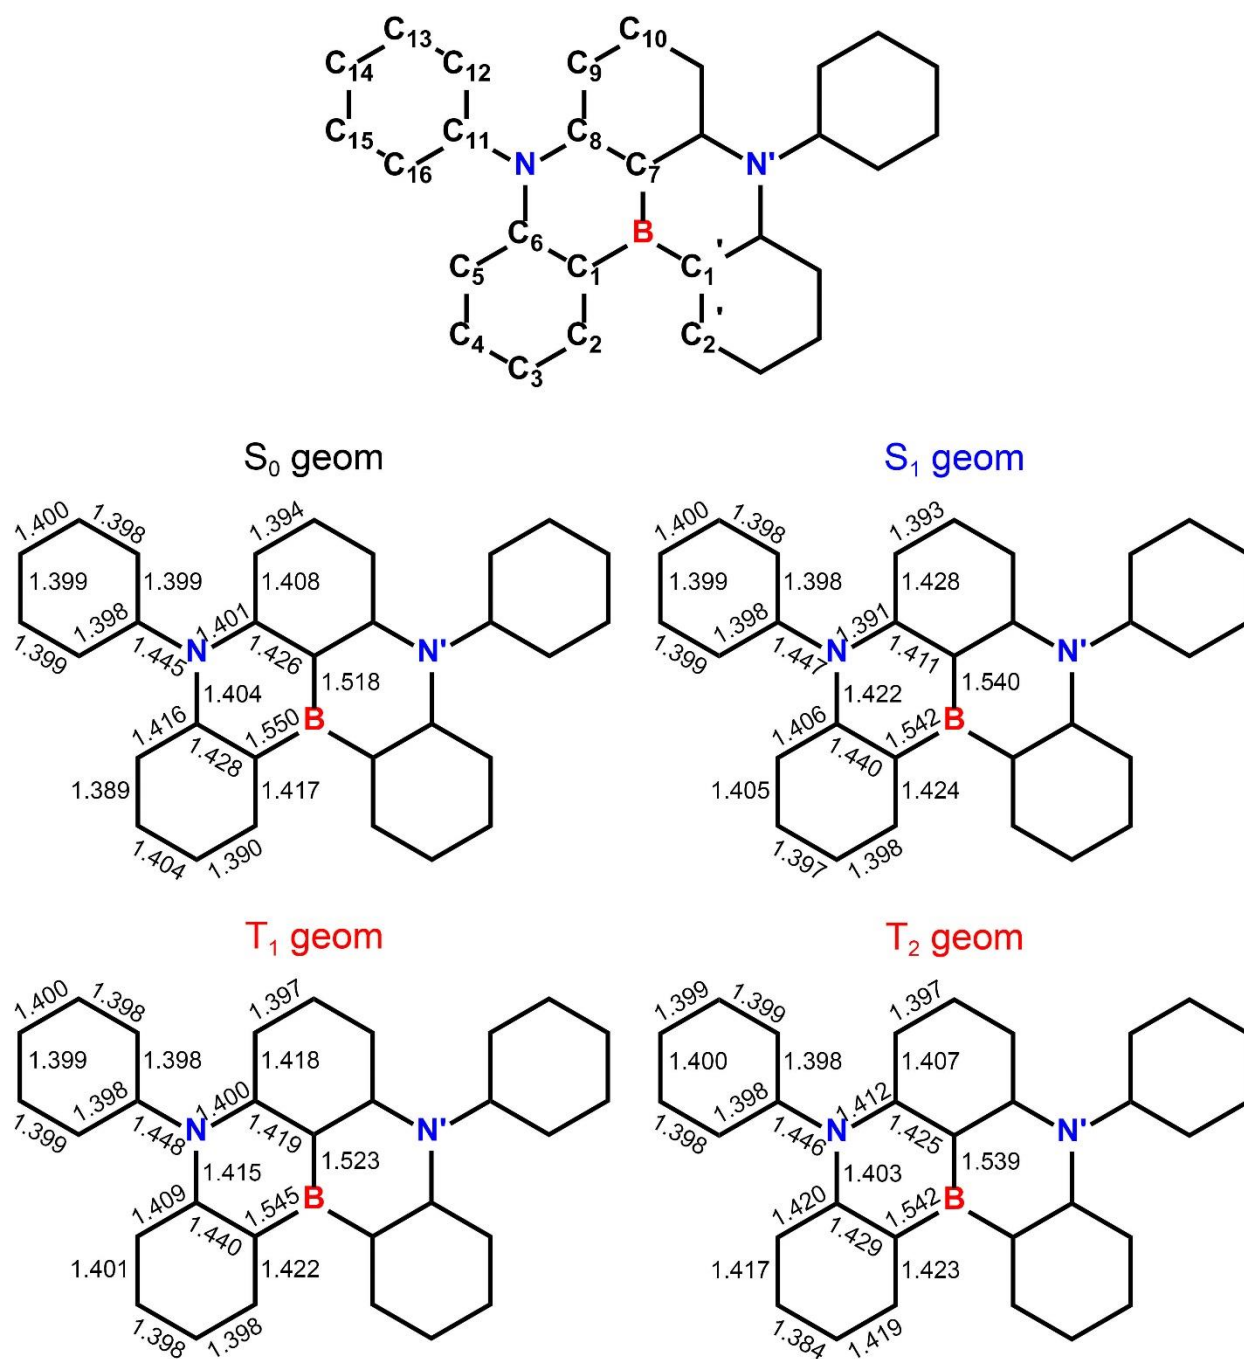

**Supplementary Figure 1.** Atom labelling scheme and bond lengths (Å) of DABNA-1.

**Supplementary Table 5.** Calculated bond lengths (Å) and dihedral angles (degree) of DABNA-1. The atom labelling scheme is shown in Supplementary Figure 1.

|                                                                   | S <sub>0</sub> geom | S <sub>1</sub> geom | T <sub>1</sub> geom | T <sub>2</sub> geom |
|-------------------------------------------------------------------|---------------------|---------------------|---------------------|---------------------|
| <b>Bond lengths</b>                                               |                     |                     |                     |                     |
| C <sub>1</sub> -C <sub>2</sub>                                    | 1.42                | 1.42                | 1.42                | 1.42                |
| C <sub>2</sub> -C <sub>3</sub>                                    | 1.39                | 1.40                | 1.40                | 1.42                |
| C <sub>3</sub> -C <sub>4</sub>                                    | 1.40                | 1.40                | 1.40                | 1.38                |
| C <sub>4</sub> -C <sub>5</sub>                                    | 1.39                | 1.41                | 1.40                | 1.42                |
| C <sub>5</sub> -C <sub>6</sub>                                    | 1.42                | 1.41                | 1.41                | 1.42                |
| C <sub>6</sub> -C <sub>1</sub>                                    | 1.43                | 1.44                | 1.44                | 1.43                |
| B-C <sub>1</sub>                                                  | 1.55                | 1.54                | 1.55                | 1.54                |
| B-C <sub>7</sub>                                                  | 1.52                | 1.54                | 1.52                | 1.54                |
| N-C <sub>6</sub>                                                  | 1.40                | 1.42                | 1.42                | 1.40                |
| N-C <sub>11</sub>                                                 | 1.45                | 1.45                | 1.45                | 1.45                |
| N-C <sub>8</sub>                                                  | 1.40                | 1.39                | 1.40                | 1.41                |
| C <sub>8</sub> -C <sub>7</sub>                                    | 1.43                | 1.41                | 1.42                | 1.43                |
| C <sub>8</sub> -C <sub>9</sub>                                    | 1.41                | 1.43                | 1.42                | 1.41                |
| C <sub>9</sub> -C <sub>10</sub>                                   | 1.39                | 1.39                | 1.40                | 1.40                |
| C <sub>11</sub> -C <sub>12</sub>                                  | 1.40                | 1.40                | 1.40                | 1.40                |
| C <sub>12</sub> -C <sub>13</sub>                                  | 1.40                | 1.40                | 1.40                | 1.40                |
| C <sub>13</sub> -C <sub>14</sub>                                  | 1.40                | 1.40                | 1.40                | 1.40                |
| C <sub>14</sub> -C <sub>15</sub>                                  | 1.40                | 1.40                | 1.40                | 1.40                |
| C <sub>15</sub> -C <sub>16</sub>                                  | 1.40                | 1.40                | 1.40                | 1.40                |
| C <sub>16</sub> -C <sub>11</sub>                                  | 1.40                | 1.40                | 1.40                | 1.40                |
| <b>Dihedral angles</b>                                            |                     |                     |                     |                     |
| B-C <sub>1</sub> -C <sub>1</sub> '-C <sub>7</sub>                 | 0.00                | 0.00                | 0.00                | 0.00                |
| C <sub>2</sub> -C <sub>1</sub> -C <sub>1</sub> '-C <sub>2</sub> ' | 20.1                | 14.3                | 14.3                | 18.2                |
| C <sub>6</sub> -N-C <sub>11</sub> -C <sub>12</sub>                | 87.6                | 88.1                | 88.3                | 87.0                |

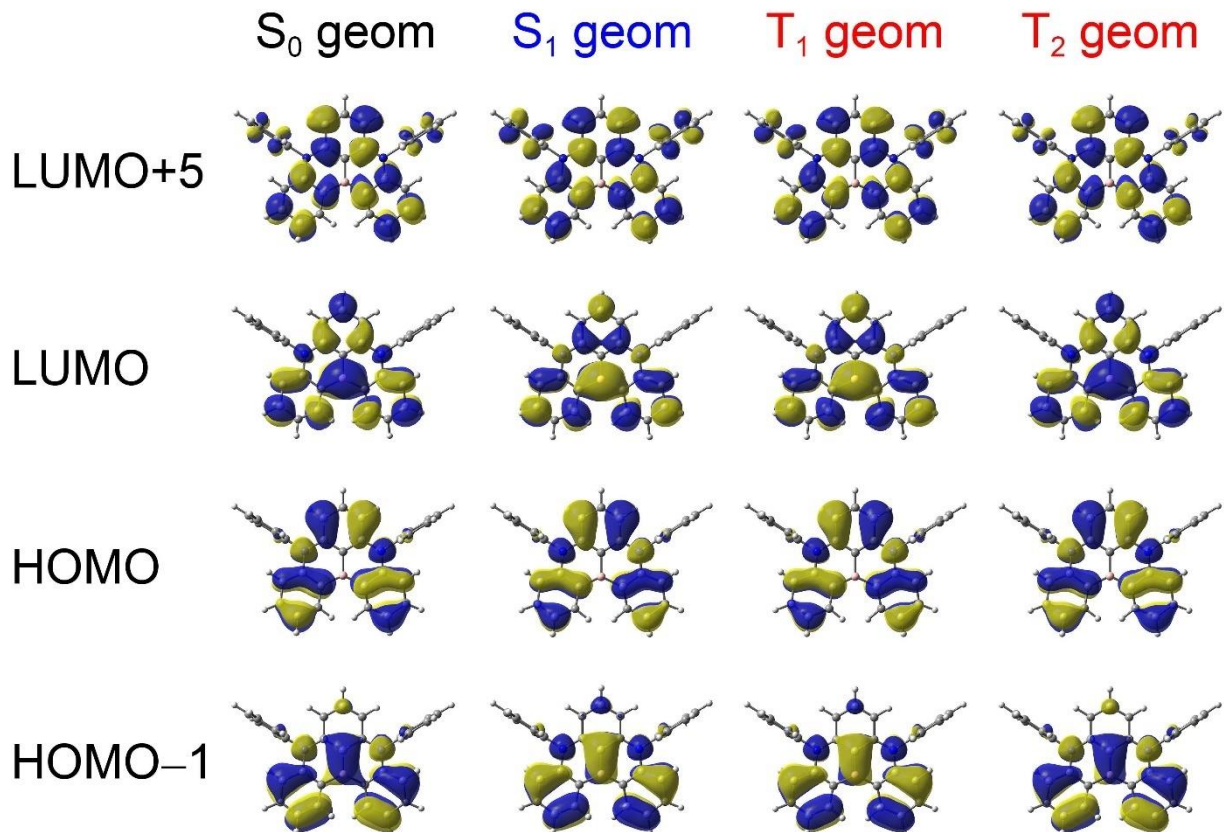

**Supplementary Figure 2.** LUMO+5, LUMO, HOMO, and HOMO-1 of DABNA-1 calculated for the  $S_0$ ,  $S_1$ ,  $T_1$ , and  $T_2$  geometries. The molecular orbitals were calculated at the RHF/6-31G level of theory. The  $S_0$  geometry was optimized at the TPSSh/6-31+G(d) level of theory (PCM: dichloromethane); the  $S_1$ ,  $T_1$ , and  $T_2$  geometries were optimized at the TD-TPSSh/6-31+G(d) level of theory (PCM: dichloromethane).



**Supplementary Table 6.**  $S_0$ ,  $S_1$ ,  $T_1$ , and  $T_2$  of DABNA-1 calculated at the EOM-CCSD/6-31G level of theory. The optimized  $S_0$  geometry in Supplementary Table 1 was used.  $\Phi_0$  denotes the Hartree-Fock determinant.  $\Phi_a^r$  and  $\Phi_{ab}^{rs}$  denote single and double excitations from  $\Phi_0$ , respectively.

| State | Excitation energy (eV) | Slater determinant                                                                                | Contribution (%) |
|-------|------------------------|---------------------------------------------------------------------------------------------------|------------------|
| $S_0$ |                        | $\Phi_0$                                                                                          | 98.18            |
|       |                        | $\Phi_{\text{HOMO}-1}^{\text{LUMO}}$                                                              | 0.28             |
|       |                        | $\overline{\Phi_{\text{HOMO}-1}^{\text{LUMO}}}$                                                   | 0.28             |
|       |                        | $\Phi_{\text{HOMO}-5}^{\text{LUMO}+4} \overline{\overline{\Phi_{\text{HOMO}-5}^{\text{LUMO}+4}}}$ | 0.25             |
|       |                        | $\overline{\overline{\Phi_{\text{HOMO}-5}^{\text{LUMO}+4}}} \Phi_{\text{HOMO}-5}^{\text{LUMO}+4}$ | 0.25             |
|       |                        | $\Phi_{\text{HOMO}-5}^{\text{LUMO}+4} \overline{\overline{\Phi_{\text{HOMO}-5}^{\text{LUMO}+4}}}$ | 0.25             |
|       |                        | $\overline{\overline{\Phi_{\text{HOMO}-5}^{\text{LUMO}+4}}} \Phi_{\text{HOMO}-5}^{\text{LUMO}+4}$ | 0.25             |
|       |                        | $\Phi_{\text{HOMO}-10}^{\text{LUMO}}$                                                             | 0.11             |
|       |                        | $\overline{\overline{\Phi_{\text{HOMO}-10}^{\text{LUMO}}}}$                                       | 0.11             |
| $T_1$ | 3.1884                 | $\Phi_{\text{HOMO}}^{\text{LUMO}}$                                                                | 48.9             |
|       |                        | $\overline{\overline{\Phi_{\text{HOMO}}^{\text{LUMO}}}}$                                          | 48.9             |
|       |                        | $\Phi_{\text{HOMO}}^{\text{LUMO}+8}$                                                              | 1.0              |
|       |                        | $\overline{\overline{\Phi_{\text{HOMO}}^{\text{LUMO}+8}}}$                                        | 1.0              |
| $S_1$ | 3.4484                 | $\Phi_{\text{HOMO}}^{\text{LUMO}}$                                                                | 48.8             |
|       |                        | $\overline{\overline{\Phi_{\text{HOMO}}^{\text{LUMO}}}}$                                          | 48.8             |
|       |                        | $\Phi_{\text{HOMO}-1}^{\text{LUMO}+5}$                                                            | 1.1              |
|       |                        | $\overline{\overline{\Phi_{\text{HOMO}-1}^{\text{LUMO}+5}}}$                                      | 1.1              |
| $T_2$ | 3.5194                 | $\Phi_{\text{HOMO}}^{\text{LUMO}+5}$                                                              | 17.3             |
|       |                        | $\overline{\overline{\Phi_{\text{HOMO}}^{\text{LUMO}+5}}}$                                        | 17.3             |

|                                                   |      |
|---------------------------------------------------|------|
| $\Phi_{\text{HOMO}-1}^{\text{LUMO}}$              | 16.1 |
| $\Phi_{\text{HOMO}-1}^{\overline{\text{LUMO}}}$   | 16.1 |
| $\Phi_{\text{HOMO}-2}^{\text{LUMO}}$              | 3.8  |
| $\Phi_{\text{HOMO}-2}^{\overline{\text{LUMO}}}$   | 3.8  |
| $\Phi_{\text{HOMO}}^{\text{LUMO}+7}$              | 3.3  |
| $\Phi_{\text{HOMO}}^{\overline{\text{LUMO}+7}}$   | 3.3  |
| $\Phi_{\text{HOMO}-3}^{\text{LUMO}+7}$            | 2.5  |
| $\Phi_{\text{HOMO}-3}^{\overline{\text{LUMO}+7}}$ | 2.5  |
| $\Phi_{\text{HOMO}-1}^{\text{LUMO}+6}$            | 2.4  |
| $\Phi_{\text{HOMO}-1}^{\overline{\text{LUMO}+6}}$ | 2.4  |
| $\Phi_{\text{HOMO}-9}^{\text{LUMO}+8}$            | 1.5  |
| $\Phi_{\text{HOMO}-9}^{\overline{\text{LUMO}+8}}$ | 1.5  |
| $\Phi_{\text{HOMO}-4}^{\text{LUMO}+9}$            | 1.3  |
| $\Phi_{\text{HOMO}-4}^{\overline{\text{LUMO}+9}}$ | 1.3  |
| $\Phi_{\text{HOMO}}^{\text{LUMO}+9}$              | 1.2  |
| $\Phi_{\text{HOMO}}^{\overline{\text{LUMO}+9}}$   | 1.2  |

---

**Supplementary Table 7.**  $S_0$ ,  $S_1$ ,  $T_1$ , and  $T_2$  of DABNA-1 calculated at the EOM-CCSD/6-31G level of theory. The optimized  $S_1$  geometry in Supplementary Table 2 was used.  $\Phi_0$  denotes the Hartree-Fock determinant.  $\Phi_a^r$  and  $\Phi_{ab}^{rs}$  denote single and double excitations from  $\Phi_0$ , respectively.

| State | Excitation energy (eV) | Slater determinant                                                              | Contribution (%) |
|-------|------------------------|---------------------------------------------------------------------------------|------------------|
| $S_0$ |                        | $\Phi_0$                                                                        | 98.04            |
|       |                        | $\Phi_{\text{HOMO}-1}^{\text{LUMO}}$                                            | 0.32             |
|       |                        | $\Phi_{\text{HOMO}-1}^{\overline{\text{LUMO}}}$                                 | 0.32             |
|       |                        | $\Phi_{\text{HOMO}-5}^{\text{LUMO}+4} \overline{\text{LUMO}+4}_{\text{HOMO}-5}$ | 0.26             |
|       |                        | $\Phi_{\text{HOMO}-5}^{\overline{\text{LUMO}+4}} \text{LUMO}+4_{\text{HOMO}-5}$ | 0.26             |
|       |                        | $\Phi_{\text{HOMO}-5}^{\text{LUMO}+4} \overline{\text{LUMO}+4}_{\text{HOMO}-5}$ | 0.26             |
|       |                        | $\Phi_{\text{HOMO}-5}^{\overline{\text{LUMO}+4}} \text{LUMO}+4_{\text{HOMO}-5}$ | 0.26             |
|       |                        | $\Phi_{\text{HOMO}-10}^{\text{LUMO}}$                                           | 0.11             |
|       |                        | $\Phi_{\text{HOMO}-10}^{\overline{\text{LUMO}}}$                                | 0.11             |
| $T_1$ | 3.0509                 | $\Phi_{\text{HOMO}}^{\text{LUMO}}$                                              | 48.7             |
|       |                        | $\Phi_{\text{HOMO}}^{\overline{\text{LUMO}}}$                                   | 48.7             |
|       |                        | $\Phi_{\text{HOMO}}^{\text{LUMO}+8}$                                            | 1.2              |
|       |                        | $\Phi_{\text{HOMO}}^{\overline{\text{LUMO}+8}}$                                 | 1.2              |
| $S_1$ | 3.2983                 | $\Phi_{\text{HOMO}}^{\text{LUMO}}$                                              | 48.8             |
|       |                        | $\Phi_{\text{HOMO}}^{\overline{\text{LUMO}}}$                                   | 48.8             |
|       |                        | $\Phi_{\text{HOMO}-1}^{\text{LUMO}+5}$                                          | 1.1              |
|       |                        | $\Phi_{\text{HOMO}-1}^{\overline{\text{LUMO}+5}}$                               | 1.1              |
| $T_2$ | 3.4324                 | $\Phi_{\text{HOMO}-1}^{\text{LUMO}}$                                            | 18.2             |
|       |                        | $\Phi_{\text{HOMO}-1}^{\overline{\text{LUMO}}}$                                 | 18.2             |

|                                                   |      |
|---------------------------------------------------|------|
| $\Phi_{\text{HOMO}}^{\text{LUMO}+5}$              | 15.9 |
| $\Phi_{\text{HOMO}}^{\overline{\text{LUMO}+5}}$   | 15.9 |
| $\Phi_{\text{HOMO}}^{\text{LUMO}+7}$              | 5.0  |
| $\Phi_{\text{HOMO}}^{\overline{\text{LUMO}+7}}$   | 5.0  |
| $\Phi_{\text{HOMO}-2}^{\text{LUMO}}$              | 2.6  |
| $\Phi_{\text{HOMO}-2}^{\overline{\text{LUMO}}}$   | 2.6  |
| $\Phi_{\text{HOMO}}^{\text{LUMO}+9}$              | 2.3  |
| $\Phi_{\text{HOMO}}^{\overline{\text{LUMO}+9}}$   | 2.3  |
| $\Phi_{\text{HOMO}-3}^{\text{LUMO}+7}$            | 2.1  |
| $\Phi_{\text{HOMO}-3}^{\overline{\text{LUMO}+7}}$ | 2.1  |
| $\Phi_{\text{HOMO}-1}^{\text{LUMO}+6}$            | 2.1  |
| $\Phi_{\text{HOMO}-1}^{\overline{\text{LUMO}+6}}$ | 2.1  |
| $\Phi_{\text{HOMO}-9}^{\text{LUMO}+8}$            | 1.4  |
| $\Phi_{\text{HOMO}-9}^{\overline{\text{LUMO}+8}}$ | 1.4  |

---

**Supplementary Table 8.**  $S_0$ ,  $S_1$ ,  $T_1$ , and  $T_2$  of DABNA-1 calculated at the EOM-CCSD/6-31G level of theory. The optimized  $T_1$  geometry in Supplementary Table 3 was used.  $\Phi_0$  denotes the Hartree-Fock determinant.  $\Phi_a^r$  and  $\Phi_{ab}^{rs}$  denote single and double excitations from  $\Phi_0$ , respectively.

| State | Excitation energy (eV) | Slater determinant                                                              | Contribution (%) |
|-------|------------------------|---------------------------------------------------------------------------------|------------------|
| $S_0$ |                        | $\Phi_0$                                                                        | 98.04            |
|       |                        | $\Phi_{\text{HOMO}-1}^{\text{LUMO}}$                                            | 0.32             |
|       |                        | $\Phi_{\text{HOMO}-1}^{\overline{\text{LUMO}}}$                                 | 0.32             |
|       |                        | $\Phi_{\text{HOMO}-5}^{\text{LUMO}+4} \overline{\text{LUMO}+4}_{\text{HOMO}-5}$ | 0.26             |
|       |                        | $\Phi_{\text{HOMO}-5}^{\overline{\text{LUMO}+4}} \text{LUMO}+4_{\text{HOMO}-5}$ | 0.26             |
|       |                        | $\Phi_{\text{HOMO}-5}^{\text{LUMO}+4} \overline{\text{LUMO}+4}_{\text{HOMO}-5}$ | 0.26             |
|       |                        | $\Phi_{\text{HOMO}-5}^{\overline{\text{LUMO}+4}} \text{LUMO}+4_{\text{HOMO}-5}$ | 0.26             |
|       |                        | $\Phi_{\text{HOMO}-10}^{\text{LUMO}}$                                           | 0.12             |
|       |                        | $\Phi_{\text{HOMO}-10}^{\overline{\text{LUMO}}}$                                | 0.12             |
| $T_1$ | 3.0582                 | $\Phi_{\text{HOMO}}^{\text{LUMO}}$                                              | 48.8             |
|       |                        | $\Phi_{\text{HOMO}}^{\overline{\text{LUMO}}}$                                   | 48.8             |
|       |                        | $\Phi_{\text{HOMO}}^{\text{LUMO}+8}$                                            | 1.1              |
|       |                        | $\Phi_{\text{HOMO}}^{\overline{\text{LUMO}+8}}$                                 | 1.1              |
| $S_1$ | 3.3177                 | $\Phi_{\text{HOMO}}^{\text{LUMO}}$                                              | 48.8             |
|       |                        | $\Phi_{\text{HOMO}}^{\overline{\text{LUMO}}}$                                   | 48.8             |
|       |                        | $\Phi_{\text{HOMO}-1}^{\text{LUMO}+5}$                                          | 1.1              |
|       |                        | $\Phi_{\text{HOMO}-1}^{\overline{\text{LUMO}+5}}$                               | 1.1              |
| $T_2$ | 3.4531                 | $\Phi_{\text{HOMO}-1}^{\text{LUMO}}$                                            | 19.5             |
|       |                        | $\Phi_{\text{HOMO}-1}^{\overline{\text{LUMO}}}$                                 | 19.5             |

|                                                   |      |
|---------------------------------------------------|------|
| $\Phi_{\text{HOMO}}^{\text{LUMO}+5}$              | 14.4 |
| $\Phi_{\text{HOMO}}^{\overline{\text{LUMO}+5}}$   | 14.4 |
| $\Phi_{\text{HOMO}}^{\text{LUMO}+7}$              | 4.8  |
| $\Phi_{\text{HOMO}}^{\overline{\text{LUMO}+7}}$   | 4.8  |
| $\Phi_{\text{HOMO}-2}^{\text{LUMO}}$              | 3.4  |
| $\Phi_{\text{HOMO}-2}^{\overline{\text{LUMO}}}$   | 3.4  |
| $\Phi_{\text{HOMO}-3}^{\text{LUMO}+7}$            | 2.4  |
| $\Phi_{\text{HOMO}-3}^{\overline{\text{LUMO}+7}}$ | 2.4  |
| $\Phi_{\text{HOMO}-1}^{\text{LUMO}+6}$            | 2.1  |
| $\Phi_{\text{HOMO}-1}^{\overline{\text{LUMO}+6}}$ | 2.1  |
| $\Phi_{\text{HOMO}}^{\text{LUMO}+9}$              | 1.6  |
| $\Phi_{\text{HOMO}}^{\overline{\text{LUMO}+9}}$   | 1.6  |
| $\Phi_{\text{HOMO}-9}^{\text{LUMO}+8}$            | 1.5  |
| $\Phi_{\text{HOMO}-9}^{\overline{\text{LUMO}+8}}$ | 1.5  |

---

**Supplementary Table 9.**  $S_0$ ,  $S_1$ ,  $T_1$ , and  $T_2$  of DABNA-1 calculated at the EOM-CCSD/6-31G level of theory. The optimized  $T_2$  geometry in Supplementary Table 4 was used.  $\Phi_0$  denotes the Hartree-Fock determinant.  $\Phi_a^r$  and  $\Phi_{ab}^{rs}$  denote single and double excitations from  $\Phi_0$ , respectively.

| State | Excitation energy (eV) | Slater determinant                                                              | Contribution (%) |
|-------|------------------------|---------------------------------------------------------------------------------|------------------|
| $S_0$ |                        | $\Phi_0$                                                                        | 98.06            |
|       |                        | $\Phi_{\text{HOMO}-1}^{\text{LUMO}}$                                            | 0.32             |
|       |                        | $\Phi_{\text{HOMO}-1}^{\overline{\text{LUMO}}}$                                 | 0.32             |
|       |                        | $\Phi_{\text{HOMO}-5}^{\text{LUMO}+4} \overline{\text{LUMO}+4}_{\text{HOMO}-5}$ | 0.26             |
|       |                        | $\Phi_{\text{HOMO}-5}^{\overline{\text{LUMO}+4}} \text{LUMO}+4_{\text{HOMO}-5}$ | 0.26             |
|       |                        | $\Phi_{\text{HOMO}-5}^{\text{LUMO}+4} \overline{\text{LUMO}+4}_{\text{HOMO}-5}$ | 0.26             |
|       |                        | $\Phi_{\text{HOMO}-5}^{\overline{\text{LUMO}+4}} \text{LUMO}+4_{\text{HOMO}-5}$ | 0.26             |
|       |                        | $\Phi_{\text{HOMO}-10}^{\text{LUMO}}$                                           | 0.11             |
|       |                        | $\Phi_{\text{HOMO}-10}^{\overline{\text{LUMO}}}$                                | 0.11             |
| $T_1$ | 3.1108                 | $\Phi_{\text{HOMO}}^{\text{LUMO}}$                                              | 49.2             |
|       |                        | $\Phi_{\text{HOMO}}^{\overline{\text{LUMO}}}$                                   | 49.2             |
|       |                        | $\Phi_{\text{HOMO}}^{\text{LUMO}+8}$                                            | 0.7              |
|       |                        | $\Phi_{\text{HOMO}}^{\overline{\text{LUMO}+8}}$                                 | 0.7              |
| $S_1$ | 3.3509                 | $\Phi_{\text{HOMO}}^{\text{LUMO}}$                                              | 48.7             |
|       |                        | $\Phi_{\text{HOMO}}^{\overline{\text{LUMO}}}$                                   | 48.7             |
|       |                        | $\Phi_{\text{HOMO}-1}^{\text{LUMO}+5}$                                          | 1.2              |
|       |                        | $\Phi_{\text{HOMO}-1}^{\overline{\text{LUMO}+5}}$                               | 1.2              |
| $T_2$ | 3.3632                 | $\Phi_{\text{HOMO}-1}^{\text{LUMO}}$                                            | 28.4             |
|       |                        | $\Phi_{\text{HOMO}-1}^{\overline{\text{LUMO}}}$                                 | 28.4             |

|                                                   |     |
|---------------------------------------------------|-----|
| $\Phi_{\text{HOMO}}^{\text{LUMO}+5}$              | 6.4 |
| $\Phi_{\text{HOMO}}^{\overline{\text{LUMO}+5}}$   | 6.4 |
| $\Phi_{\text{HOMO}-3}^{\text{LUMO}+7}$            | 4.1 |
| $\Phi_{\text{HOMO}-3}^{\overline{\text{LUMO}+7}}$ | 4.1 |
| $\Phi_{\text{HOMO}}^{\text{LUMO}+7}$              | 4.1 |
| $\Phi_{\text{HOMO}}^{\overline{\text{LUMO}+7}}$   | 4.1 |
| $\Phi_{\text{HOMO}-3}^{\text{LUMO}+2}$            | 1.8 |
| $\Phi_{\text{HOMO}-3}^{\overline{\text{LUMO}+2}}$ | 1.8 |
| $\Phi_{\text{HOMO}-1}^{\text{LUMO}+6}$            | 1.7 |
| $\Phi_{\text{HOMO}-1}^{\overline{\text{LUMO}+6}}$ | 1.7 |
| $\Phi_{\text{HOMO}-2}^{\overline{\text{LUMO}}}$   | 1.7 |
| $\Phi_{\text{HOMO}-2}^{\text{LUMO}}$              | 1.7 |
| $\Phi_{\text{HOMO}-9}^{\text{LUMO}+8}$            | 1.4 |
| $\Phi_{\text{HOMO}-9}^{\overline{\text{LUMO}+8}}$ | 1.4 |

---



**Supplementary Table 10.** CCSD total energies of S<sub>0</sub>, and S<sub>0</sub>-S<sub>n</sub>, S<sub>0</sub>-T<sub>n</sub> excitation energies ( $n = 1, 2, 3, 4$ ) of DABNA-1 calculated at the EOM-CCSD/6-31G level of theory. The S<sub>0</sub> energies are in hartree. The excitation energies are in eV.

|                                | S <sub>0</sub> geometry | S <sub>1</sub> geometry | T <sub>1</sub> geometry | T <sub>2</sub> geometry |
|--------------------------------|-------------------------|-------------------------|-------------------------|-------------------------|
| S <sub>0</sub>                 | -1284.49691555          | -1284.49381062          | -1284.49482879          | -1284.49472712          |
| S <sub>0</sub> -S <sub>1</sub> | 3.4484                  | 3.2983                  | 3.3177                  | 3.3509                  |
| S <sub>0</sub> -S <sub>2</sub> | 4.4293                  | 4.3175                  | 4.3319                  | 4.2405                  |
| S <sub>0</sub> -S <sub>3</sub> | 4.5524                  | 4.4801                  | 4.4713                  | 4.5218                  |
| S <sub>0</sub> -S <sub>4</sub> | 4.8762                  | 4.8201                  | 4.8260                  | 4.8154                  |
| S <sub>0</sub> -T <sub>1</sub> | 3.1884                  | 3.0509                  | 3.0582                  | 3.1108                  |
| S <sub>0</sub> -T <sub>2</sub> | 3.5194                  | 3.4324                  | 3.4531                  | 3.3632                  |
| S <sub>0</sub> -T <sub>3</sub> | 3.7094                  | 3.6351                  | 3.6463                  | 3.5616                  |
| S <sub>0</sub> -T <sub>4</sub> | 3.9125                  | 3.7817                  | 3.8156                  | 3.8358                  |

**Supplementary Table 11.** S<sub>0</sub>, S<sub>n</sub>, and T<sub>n</sub> electronic energies ( $n = 1, 2, 3, 4$ ) of DABNA-1 calculated from Supplementary Table 10. The zero point of the energies is set to be the S<sub>0</sub> energy at the S<sub>0</sub> geometry. The smallest S<sub>0</sub>, S<sub>1</sub>, T<sub>1</sub>, and T<sub>2</sub> energies are underlined. The smallest S<sub>0</sub> energy is found at the S<sub>0</sub> geometry. The smallest S<sub>1</sub> and T<sub>1</sub> energies are found at the T<sub>1</sub> geometry. The smallest T<sub>2</sub> energy is found at the T<sub>2</sub> geometry. Thus, the local minima of the S<sub>1</sub> and T<sub>1</sub> potentials are located at the T<sub>1</sub> geometry. Values are in eV.

|                | S <sub>0</sub> geometry | S <sub>1</sub> geometry | T <sub>1</sub> geometry | T <sub>2</sub> geometry |
|----------------|-------------------------|-------------------------|-------------------------|-------------------------|
| S <sub>0</sub> | <u>0.0000</u>           | 0.0845                  | 0.0568                  | 0.0596                  |
| S <sub>1</sub> | 3.4484                  | 3.3828                  | <u>3.3745</u>           | 3.4105                  |
| S <sub>2</sub> | 4.4293                  | 4.4020                  | 4.3887                  | 4.3001                  |
| S <sub>3</sub> | 4.5524                  | 4.5646                  | 4.5281                  | 4.5814                  |
| S <sub>4</sub> | 4.8762                  | 4.9046                  | 4.8828                  | 4.8750                  |
| T <sub>1</sub> | 3.1884                  | 3.1354                  | <u>3.1150</u>           | 3.1704                  |
| T <sub>2</sub> | 3.5194                  | 3.5169                  | 3.5099                  | <u>3.4228</u>           |
| T <sub>3</sub> | 3.7094                  | 3.7196                  | 3.7031                  | 3.6212                  |
| T <sub>4</sub> | 3.9125                  | 3.8662                  | 3.8724                  | 3.8954                  |

**Supplementary Table 12.**  $S_0$ ,  $S_n$ , and  $T_n$  electronic energies ( $n = 1, 2, 3, 4$ ) of DABNA-1 after  $T_1$  energy correction. The zero point of the energies is set to be the  $S_0$  energy at the  $S_0$  geometry. The smallest  $S_0$ ,  $S_1$ ,  $T_1$ , and  $T_2$  energies are underlined. The smallest  $S_0$  energy is found at the  $S_0$  geometry. The smallest  $S_1$  and  $T_1$  energies are found at the  $T_1$  geometry. The smallest  $T_2$  energy is found at the  $T_2$  geometry. Thus, the local minima of the  $S_1$  and  $T_1$  potentials are located at the  $T_1$  geometry. Values are in eV.

|       | $S_0$ geometry | $S_1$ geometry | $T_1$ geometry | $T_2$ geometry |
|-------|----------------|----------------|----------------|----------------|
| $S_0$ | <u>0.00</u>    | 0.08           | 0.06           | 0.06           |
| $S_1$ | 3.45           | 3.38           | <u>3.37</u>    | 3.41           |
| $S_2$ | 4.43           | 4.40           | 4.39           | 4.30           |
| $S_3$ | 4.55           | 4.56           | 4.53           | 4.58           |
| $S_4$ | 4.88           | 4.90           | 4.88           | 4.88           |
| $T_1$ | 3.25           | 3.20           | <u>3.18</u>    | 3.23           |
| $T_2$ | 3.52           | 3.52           | 3.51           | <u>3.42</u>    |
| $T_3$ | 3.71           | 3.72           | 3.70           | 3.62           |
| $T_4$ | 3.91           | 3.87           | 3.87           | 3.90           |

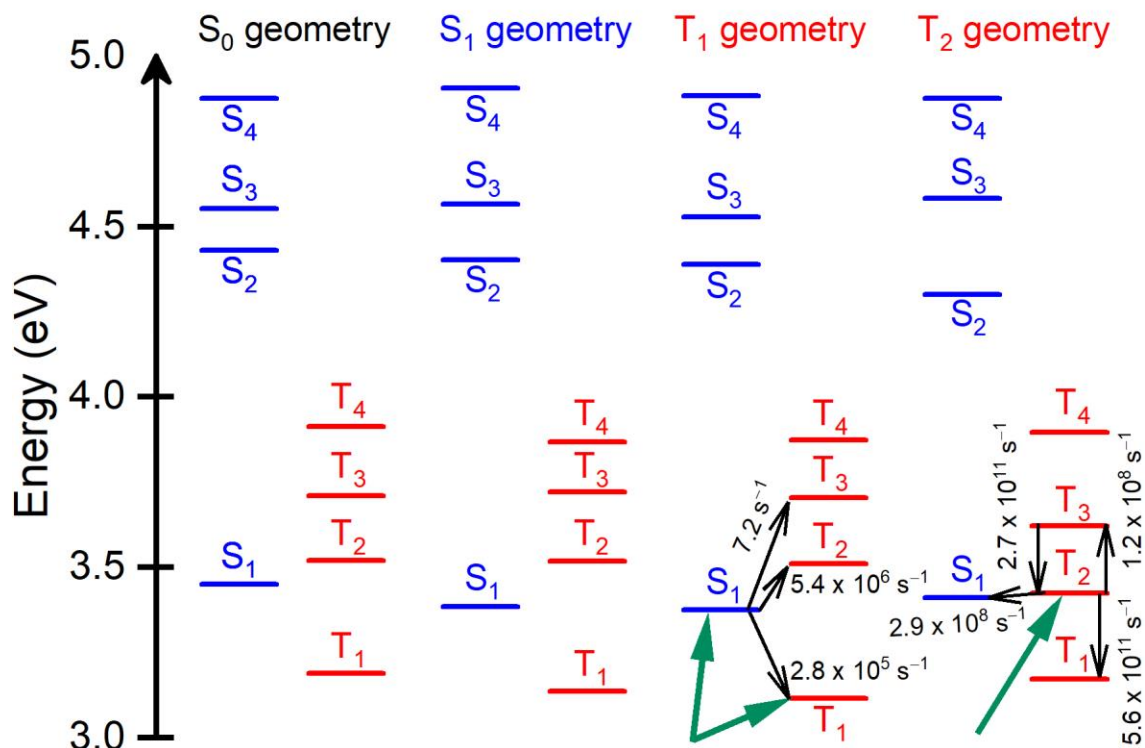

**Supplementary Figure 3.** Energy level diagrams calculated at the EOM-CCSD/6-31G level of theory. The minimum  $S_1$ ,  $T_1$ , and  $T_2$  energies are designated by green arrows. Electronic transitions from/to  $T_3$  are designated by black arrows. The numerical values at the black arrows are the corresponding rate constants.

**Supplementary Table 13.** Energy difference between electronic states (meV).

|                                       | S <sub>0</sub> geom | S <sub>1</sub> T <sub>1</sub> | T <sub>2</sub> geom |
|---------------------------------------|---------------------|-------------------------------|---------------------|
| Raw EOM-CCSD (Supplementary Table 11) |                     |                               |                     |
| $\Delta E(S_1-T_2)$                   | 71                  | 135                           | 12                  |
| $\Delta E(T_1-T_2)$                   | 331                 | 395                           | 242                 |
| $\Delta E(S_1-T_1)$                   | 260                 | 259                           | 240                 |
| Corrected (Supplementary Table 12)    |                     |                               |                     |
| $\Delta E(S_1-T_2)$                   | 71                  | 135                           | 12                  |
| $\Delta E(T_1-T_2)$                   | 271                 | 335                           | 182                 |
| $\Delta E(S_1-T_1)$                   | 200                 | 199                           | 180                 |

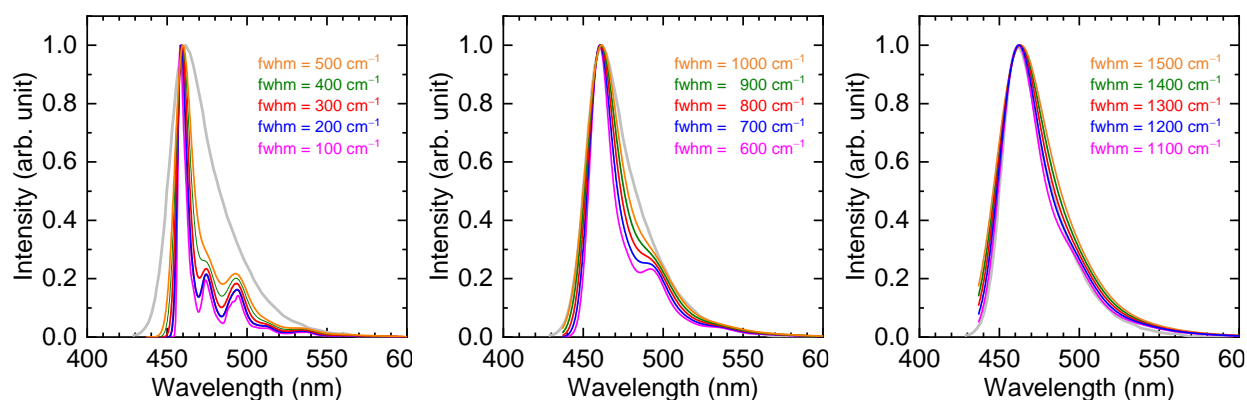**Supplementary Figure 4.** Calculated (the orange, green, red, blue, and purple lines) and experimental (the grey lines) emission spectra in CH<sub>2</sub>Cl<sub>2</sub> solution. The emission spectra were calculated at the TD-TPSSH/6-31+G(d) level of theory with fwhm value of 100–1500 cm<sup>-1</sup>. The best fit between the calculated and experimental spectra was obtained when fwhm = 1200 cm<sup>-1</sup>, where fwhm = 2 $\gamma$  (see Supplementary Equation S4).

**Supplementary Table 14.** Interstate vibronic-coupling ( $V_{\alpha}(T_m-T_n)@T_2$ ) and the resulting  $R_{\alpha}/\hbar$  of the  $\alpha^{\text{th}}$  vibrational mode between  $S_0$  and  $S_1$  for DABNA-1 calculated at the  $T_2$  geometry.  $R_{\alpha}$  are calculated using the corrected  $\Delta E(T_1-T_2)$ . The line shape function (LSF) for the  $\alpha^{\text{th}}$  vibrational mode. Contribution from the  $\alpha^{\text{th}}$  mode to  $k_{\text{IC}}$  ( $k_{\text{IC}, \alpha}$ ).  $k_{\text{IC}} = \sum_{\alpha} k_{\text{IC}, \alpha} = 5.63 \times 10^{11} \text{ s}^{-1}$ .  $R_{\alpha}/\hbar$ ,  $\text{LSF}_{\text{IC}, \alpha}$ , and  $r_{\text{IC}, \alpha}$  versus wavenumber plots are shown in Supplementary Figure 5.

| $\alpha$ | Wavenumber<br>( $\text{cm}^{-1}$ ) | $V_{\alpha}$<br>( $10^{-4}$ a.u.) | $R_{\alpha}/\hbar$<br>( $10^{14} \text{ s}^{-1}$ ) | $\text{LSF}_{\text{IC}, \alpha}$<br>( $10^{-3}$ ) | $k_{\text{IC}, \alpha}$<br>( $10^{11} \text{ s}^{-1}$ ) |
|----------|------------------------------------|-----------------------------------|----------------------------------------------------|---------------------------------------------------|---------------------------------------------------------|
| 1        | 21.81                              | 0.023066                          | 0.000044                                           | 2.640700                                          | 0.000116                                                |
| 2        | 22.23                              | 0.085906                          | 0.000610                                           | 2.591100                                          | 0.001581                                                |
| 3        | 41.64                              | 0.153510                          | 0.001949                                           | 1.391300                                          | 0.002711                                                |
| 4        | 47.64                              | 0.003319                          | 0.000001                                           | 1.219000                                          | 0.000001                                                |
| 5        | 53.07                              | 0.005090                          | 0.000002                                           | 1.097100                                          | 0.000002                                                |
| 6        | 73.84                              | 0.016978                          | 0.000024                                           | 0.798310                                          | 0.000019                                                |
| 7        | 74.31                              | 0.010583                          | 0.000009                                           | 0.793530                                          | 0.000007                                                |
| 8        | 79.34                              | 0.129710                          | 0.001391                                           | 0.745800                                          | 0.001038                                                |
| 9        | 90.75                              | 0.227960                          | 0.004297                                           | 0.657860                                          | 0.002827                                                |
| 10       | 119.56                             | 0.000734                          | 0.000000                                           | 0.513240                                          | 0.000000                                                |
| 11       | 169.91                             | 0.015420                          | 0.000020                                           | 0.384780                                          | 0.000008                                                |
| 12       | 184.93                             | 3.649100                          | 1.101200                                           | 0.361520                                          | 0.398090                                                |
| 13       | 202.62                             | 0.020537                          | 0.000035                                           | 0.339380                                          | 0.000012                                                |
| 14       | 204.47                             | 0.408020                          | 0.013767                                           | 0.337330                                          | 0.004644                                                |
| 15       | 205.88                             | 0.145530                          | 0.001751                                           | 0.335810                                          | 0.000588                                                |
| 16       | 208.95                             | 1.281200                          | 0.135740                                           | 0.332570                                          | 0.045144                                                |
| 17       | 234.38                             | 0.008272                          | 0.000006                                           | 0.309980                                          | 0.000002                                                |
| 18       | 265.37                             | 0.005966                          | 0.000003                                           | 0.290280                                          | 0.000001                                                |
| 19       | 276.46                             | 1.218600                          | 0.122800                                           | 0.284820                                          | 0.034976                                                |
| 20       | 295.33                             | 2.786700                          | 0.642180                                           | 0.277080                                          | 0.177940                                                |
| 21       | 337.81                             | 1.385800                          | 0.158810                                           | 0.265310                                          | 0.042134                                                |
| 22       | 359.49                             | 0.697130                          | 0.040189                                           | 0.261660                                          | 0.010516                                                |
| 23       | 380.56                             | 0.037872                          | 0.000119                                           | 0.259330                                          | 0.000031                                                |
| 24       | 406.27                             | 0.068563                          | 0.000389                                           | 0.257870                                          | 0.000100                                                |
| 25       | 409.25                             | 0.952810                          | 0.075074                                           | 0.257790                                          | 0.019353                                                |
| 26       | 414.00                             | 0.001314                          | 0.000000                                           | 0.257690                                          | 0.000000                                                |
| 27       | 417.00                             | 0.613720                          | 0.031147                                           | 0.257660                                          | 0.008025                                                |
| 28       | 420.25                             | 0.027014                          | 0.000060                                           | 0.257630                                          | 0.000016                                                |
| 29       | 449.41                             | 0.121110                          | 0.001213                                           | 0.258250                                          | 0.000313                                                |
| 30       | 449.60                             | 0.707990                          | 0.041451                                           | 0.258250                                          | 0.010705                                                |
| 31       | 461.01                             | 1.144000                          | 0.108230                                           | 0.258870                                          | 0.028016                                                |
| 32       | 501.18                             | 0.664110                          | 0.036472                                           | 0.262490                                          | 0.009573                                                |
| 33       | 508.28                             | 0.010085                          | 0.000008                                           | 0.263350                                          | 0.000002                                                |
| 34       | 521.59                             | 0.022842                          | 0.000043                                           | 0.265120                                          | 0.000011                                                |
| 35       | 525.06                             | 0.814420                          | 0.054850                                           | 0.265620                                          | 0.014569                                                |
| 36       | 534.17                             | 0.431900                          | 0.015426                                           | 0.266990                                          | 0.004118                                                |
| 37       | 575.17                             | 0.330580                          | 0.009037                                           | 0.274270                                          | 0.002479                                                |

|    |         |          |          |          |          |
|----|---------|----------|----------|----------|----------|
| 38 | 592.32  | 0.000612 | 0.000000 | 0.277830 | 0.000000 |
| 39 | 610.31  | 0.000649 | 0.000000 | 0.281880 | 0.000000 |
| 40 | 616.74  | 0.447380 | 0.016551 | 0.283400 | 0.004691 |
| 41 | 621.92  | 0.037955 | 0.000119 | 0.284660 | 0.000034 |
| 42 | 621.96  | 0.004676 | 0.000002 | 0.284670 | 0.000001 |
| 43 | 625.60  | 0.000675 | 0.000000 | 0.285570 | 0.000000 |
| 44 | 640.30  | 0.000042 | 0.000000 | 0.289320 | 0.000000 |
| 45 | 645.67  | 0.603850 | 0.030153 | 0.290740 | 0.008767 |
| 46 | 676.23  | 0.284750 | 0.006705 | 0.299330 | 0.002007 |
| 47 | 684.11  | 0.011770 | 0.000011 | 0.301680 | 0.000003 |
| 48 | 688.19  | 0.147470 | 0.001798 | 0.302920 | 0.000545 |
| 49 | 705.58  | 0.007767 | 0.000005 | 0.308390 | 0.000002 |
| 50 | 706.15  | 1.103700 | 0.100730 | 0.308570 | 0.031084 |
| 51 | 721.26  | 0.004273 | 0.000002 | 0.313550 | 0.000000 |
| 52 | 725.56  | 0.009917 | 0.000008 | 0.315000 | 0.000003 |
| 53 | 725.80  | 0.016782 | 0.000023 | 0.315080 | 0.000007 |
| 54 | 740.33  | 0.130140 | 0.001401 | 0.320130 | 0.000448 |
| 55 | 743.22  | 6.743300 | 3.760300 | 0.321150 | 1.207600 |
| 56 | 761.57  | 0.802630 | 0.053273 | 0.327850 | 0.017466 |
| 57 | 768.09  | 0.007892 | 0.000005 | 0.330310 | 0.000002 |
| 58 | 789.37  | 2.597800 | 0.558070 | 0.338600 | 0.188960 |
| 59 | 800.22  | 0.004179 | 0.000001 | 0.343000 | 0.000000 |
| 60 | 816.02  | 0.840370 | 0.058401 | 0.349610 | 0.020417 |
| 61 | 839.66  | 0.001180 | 0.000000 | 0.359960 | 0.000000 |
| 62 | 856.82  | 0.000452 | 0.000000 | 0.367830 | 0.000000 |
| 63 | 856.90  | 0.064657 | 0.000346 | 0.367860 | 0.000127 |
| 64 | 857.99  | 0.001483 | 0.000000 | 0.368370 | 0.000000 |
| 65 | 864.36  | 0.722410 | 0.043156 | 0.371380 | 0.016027 |
| 66 | 872.14  | 0.004129 | 0.000001 | 0.375110 | 0.000001 |
| 67 | 894.96  | 0.003572 | 0.000001 | 0.386420 | 0.000000 |
| 68 | 899.45  | 1.833300 | 0.277930 | 0.388720 | 0.108040 |
| 69 | 919.45  | 0.000071 | 0.000000 | 0.399210 | 0.000000 |
| 70 | 929.19  | 0.503410 | 0.020957 | 0.404480 | 0.008477 |
| 71 | 942.25  | 0.070902 | 0.000416 | 0.411730 | 0.000171 |
| 72 | 942.52  | 0.000297 | 0.000000 | 0.411880 | 0.000000 |
| 73 | 946.16  | 0.392340 | 0.012729 | 0.413940 | 0.005269 |
| 74 | 947.05  | 0.003193 | 0.000001 | 0.414440 | 0.000000 |
| 75 | 956.34  | 1.149000 | 0.109170 | 0.419770 | 0.045828 |
| 76 | 987.56  | 0.000453 | 0.000000 | 0.438480 | 0.000000 |
| 77 | 987.57  | 0.008801 | 0.000006 | 0.438480 | 0.000003 |
| 78 | 1008.10 | 0.043816 | 0.000159 | 0.451470 | 0.000072 |
| 79 | 1008.10 | 0.000011 | 0.000000 | 0.451470 | 0.000000 |
| 80 | 1012.30 | 0.002236 | 0.000000 | 0.454190 | 0.000000 |
| 81 | 1012.60 | 0.822840 | 0.055990 | 0.454390 | 0.025441 |
| 82 | 1041.90 | 0.214300 | 0.003798 | 0.474080 | 0.001800 |

|     |         |          |          |          |          |
|-----|---------|----------|----------|----------|----------|
| 83  | 1047.20 | 0.000272 | 0.000000 | 0.477780 | 0.000000 |
| 84  | 1050.60 | 0.870800 | 0.062707 | 0.480170 | 0.030110 |
| 85  | 1052.80 | 0.000567 | 0.000000 | 0.481720 | 0.000000 |
| 86  | 1079.60 | 0.001308 | 0.000000 | 0.501250 | 0.000000 |
| 87  | 1100.00 | 0.030361 | 0.000076 | 0.516850 | 0.000039 |
| 88  | 1100.10 | 0.122360 | 0.001238 | 0.516920 | 0.000640 |
| 89  | 1102.40 | 1.660700 | 0.228060 | 0.518720 | 0.118300 |
| 90  | 1111.20 | 2.408900 | 0.479860 | 0.525690 | 0.252260 |
| 91  | 1112.30 | 0.019520 | 0.000032 | 0.526570 | 0.000017 |
| 92  | 1137.90 | 0.000614 | 0.000000 | 0.547610 | 0.000000 |
| 93  | 1171.90 | 0.002058 | 0.000000 | 0.577290 | 0.000000 |
| 94  | 1187.60 | 0.000044 | 0.000000 | 0.591690 | 0.000000 |
| 95  | 1187.60 | 0.016257 | 0.000022 | 0.591690 | 0.000013 |
| 96  | 1189.70 | 0.002834 | 0.000001 | 0.593660 | 0.000000 |
| 97  | 1191.80 | 2.404000 | 0.477910 | 0.595620 | 0.284650 |
| 98  | 1198.50 | 1.454900 | 0.175040 | 0.601960 | 0.105370 |
| 99  | 1199.00 | 0.010811 | 0.000010 | 0.602440 | 0.000006 |
| 100 | 1204.80 | 0.476710 | 0.018793 | 0.608000 | 0.011426 |
| 101 | 1223.30 | 3.298600 | 0.899780 | 0.626180 | 0.563420 |
| 102 | 1233.20 | 0.002138 | 0.000000 | 0.636180 | 0.000000 |
| 103 | 1247.90 | 1.943300 | 0.312290 | 0.651400 | 0.203420 |
| 104 | 1248.70 | 0.002774 | 0.000001 | 0.652240 | 0.000000 |
| 105 | 1272.80 | 0.000373 | 0.000000 | 0.678190 | 0.000000 |
| 106 | 1292.30 | 0.650660 | 0.035009 | 0.700090 | 0.024510 |
| 107 | 1313.50 | 0.000534 | 0.000000 | 0.724830 | 0.000000 |
| 108 | 1324.60 | 0.412490 | 0.014070 | 0.738180 | 0.010386 |
| 109 | 1340.30 | 0.000228 | 0.000000 | 0.757530 | 0.000000 |
| 110 | 1340.60 | 0.033456 | 0.000093 | 0.757910 | 0.000070 |
| 111 | 1362.10 | 0.118540 | 0.001162 | 0.785340 | 0.000913 |
| 112 | 1362.20 | 0.000008 | 0.000000 | 0.785470 | 0.000000 |
| 113 | 1363.70 | 0.485260 | 0.019473 | 0.787430 | 0.015333 |
| 114 | 1367.30 | 0.001437 | 0.000000 | 0.792140 | 0.000000 |
| 115 | 1392.20 | 0.189290 | 0.002963 | 0.825540 | 0.002446 |
| 116 | 1416.40 | 0.098988 | 0.000810 | 0.859380 | 0.000696 |
| 117 | 1427.90 | 0.000471 | 0.000000 | 0.875940 | 0.000000 |
| 118 | 1443.60 | 0.000614 | 0.000000 | 0.899040 | 0.000000 |
| 119 | 1456.60 | 0.391900 | 0.012701 | 0.918590 | 0.011667 |
| 120 | 1477.50 | 0.311670 | 0.008033 | 0.950820 | 0.007638 |
| 121 | 1483.10 | 0.000772 | 0.000000 | 0.959620 | 0.000000 |
| 122 | 1488.10 | 0.012783 | 0.000014 | 0.967530 | 0.000013 |
| 123 | 1488.30 | 0.036785 | 0.000112 | 0.967850 | 0.000108 |
| 124 | 1495.30 | 2.348000 | 0.455900 | 0.979020 | 0.446340 |
| 125 | 1506.40 | 0.000940 | 0.000000 | 0.996940 | 0.000000 |
| 126 | 1519.50 | 0.981420 | 0.079650 | 1.018400 | 0.081116 |
| 127 | 1531.90 | 0.005986 | 0.000003 | 1.039000 | 0.000003 |

|     |         |          |          |          |          |
|-----|---------|----------|----------|----------|----------|
| 128 | 1532.30 | 0.736420 | 0.044846 | 1.039700 | 0.046627 |
| 129 | 1548.80 | 0.000799 | 0.000000 | 1.067600 | 0.000000 |
| 130 | 1565.30 | 0.003067 | 0.000001 | 1.095900 | 0.000001 |
| 131 | 1577.10 | 2.874200 | 0.683140 | 1.116500 | 0.762710 |
| 132 | 1632.30 | 0.003947 | 0.000001 | 1.214600 | 0.000002 |
| 133 | 1632.40 | 0.005083 | 0.000002 | 1.214700 | 0.000003 |
| 134 | 1639.60 | 0.000550 | 0.000000 | 1.227700 | 0.000000 |
| 135 | 1640.70 | 0.499410 | 0.020625 | 1.229700 | 0.025362 |
| 136 | 3185.60 | 0.937490 | 0.072679 | 0.339200 | 0.024653 |
| 137 | 3186.40 | 0.000101 | 0.000000 | 0.338840 | 0.000000 |
| 138 | 3191.40 | 0.005969 | 0.000003 | 0.336570 | 0.000001 |
| 139 | 3191.40 | 0.155610 | 0.002002 | 0.336570 | 0.000674 |
| 140 | 3194.20 | 0.000012 | 0.000000 | 0.335320 | 0.000000 |
| 141 | 3198.40 | 0.000357 | 0.000000 | 0.333440 | 0.000000 |
| 142 | 3198.40 | 0.009796 | 0.000008 | 0.333440 | 0.000003 |
| 143 | 3203.40 | 0.458480 | 0.017383 | 0.331230 | 0.005758 |
| 144 | 3205.50 | 0.000014 | 0.000000 | 0.330300 | 0.000000 |
| 145 | 3206.50 | 0.428540 | 0.015187 | 0.329870 | 0.005010 |
| 146 | 3206.50 | 0.005673 | 0.000003 | 0.329870 | 0.000001 |
| 147 | 3212.30 | 0.378540 | 0.011849 | 0.327340 | 0.003879 |
| 148 | 3212.80 | 0.001981 | 0.000000 | 0.327120 | 0.000000 |
| 149 | 3212.80 | 0.015074 | 0.000019 | 0.327120 | 0.000006 |
| 150 | 3219.50 | 0.001228 | 0.000000 | 0.324240 | 0.000000 |
| 151 | 3219.60 | 0.393650 | 0.012814 | 0.324190 | 0.004154 |
| 152 | 3224.90 | 0.000047 | 0.000000 | 0.321940 | 0.000000 |
| 153 | 3230.30 | 0.855770 | 0.060561 | 0.319660 | 0.019359 |
| 154 | 3231.90 | 1.351800 | 0.151110 | 0.318990 | 0.048204 |
| 155 | 3232.40 | 0.001352 | 0.000000 | 0.318780 | 0.000000 |
| 156 | 3234.10 | 0.000056 | 0.000000 | 0.318070 | 0.000000 |



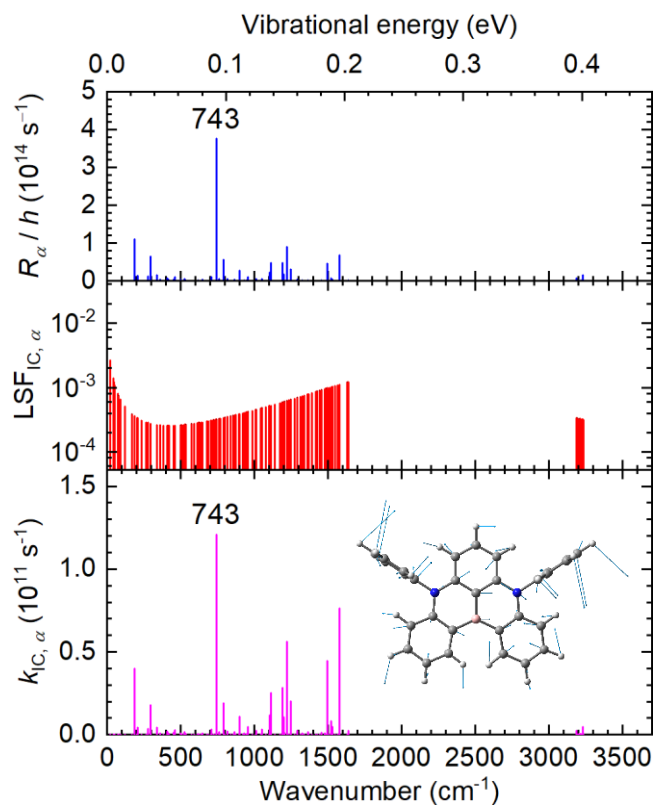

**Supplementary Figure 5.** Calculated  $R_{\alpha}/\hbar$ ,  $LSF_{IC, \alpha}$ , and  $k_{IC, \alpha}$  for the  $T_1@T_2 \rightarrow T_2@T_2$  internal conversion of DABNA-1. The vibrational mode with the wavenumber of  $743 \text{ cm}^{-1}$  has the largest contribution to the  $T_1@T_2 \rightarrow T_2@T_2$  internal conversion. The inset figure shows the vibrational mode with the wavenumber of  $743 \text{ cm}^{-1}$ .

**The kinetic equations for calculating  $S_0$ ,  $S_1$ ,  $T_1$ , and  $T_2$  populations**

$$\begin{aligned} \frac{d}{dt} [S_1 @ S_1 T_1](t) = & - \left( k_{S_1 \rightarrow T_1}^{S_1 T_1} + k_{S_1 \rightarrow T_2}^{S_1 T_1} + k_{S_1 \rightarrow S_0}^{S_1 T_1} + k_F^{S_1 T_1} \right) [S_1 @ S_1 T_1](t) \\ & + k_{T_1 \rightarrow S_1}^{S_1 T_1} [T_1 @ S_1 T_1](t) + k_{T_2 \rightarrow S_1}^{S_1 T_1} [T_2 @ S_1 T_1](t) + k_{S_1, GR} [S_1 @ T_2](t) \end{aligned} \quad (S10)$$

$$\begin{aligned} \frac{d}{dt} [T_1 @ S_1 T_1](t) = & - \left( k_{T_1 \rightarrow S_1}^{S_1 T_1} + k_{T_1 \rightarrow T_2}^{S_1 T_1} + k_{P, T_1}^{S_1 T_1} \right) [T_1 @ S_1 T_1](t) \\ & + k_{S_1 \rightarrow T_1}^{S_1 T_1} [S_1 @ S_1 T_1](t) + k_{T_2 \rightarrow T_1}^{S_1 T_1} [T_2 @ S_1 T_1](t) + k_{T_1, GR} [T_1 @ T_2](t) \end{aligned} \quad (S11)$$

$$\begin{aligned} \frac{d}{dt} [T_2 @ S_1 T_1](t) = & - \left( k_{T_2 \rightarrow S_1}^{S_1 T_1} + k_{T_2 \rightarrow T_1}^{S_1 T_1} + k_{T_2 \rightarrow S_0}^{S_1 T_1} + k_{P, T_2}^{S_1 T_1} + k_{T_2, GR} \right) [T_2 @ S_1 T_1](t) \\ & + k_{S_1 \rightarrow T_2}^{S_1 T_1} [S_1 @ S_1 T_1](t) + k_{T_1 \rightarrow T_2}^{S_1 T_1} [T_1 @ S_1 T_1](t) \end{aligned} \quad (S12)$$

$$\begin{aligned} \frac{d}{dt} [S_0 @ S_1 T_1](t) = & \left( k_{S_1 \rightarrow S_0}^{S_1 T_1} + k_F^{S_1 T_1} \right) [S_1 @ S_1 T_1](t) \\ & + \left( k_{T_1 \rightarrow S_0}^{S_1 T_1} + k_{P, T_1}^{S_1 T_1} \right) [T_1 @ S_1 T_1](t) + \left( k_{T_2 \rightarrow S_0}^{S_1 T_1} + k_{P, T_2}^{S_1 T_1} \right) [T_2 @ S_1 T_1](t) \end{aligned} \quad (S13)$$

$$\begin{aligned} \frac{d}{dt} [S_1 @ T_2](t) &= - \left( k_{S_1 \rightarrow T_1}^{T_2} + k_{S_1 \rightarrow T_2}^{T_2} + k_{S_1 \rightarrow S_0}^{T_2} + k_F^{T_2} + k_{S_1, GR} \right) [S_1 @ T_2](t) \\ &+ k_{T_1 \rightarrow S_1}^{T_2} [T_1 @ T_2](t) + k_{T_2 \rightarrow S_1}^{T_2} [T_2 @ T_2](t) \end{aligned} \quad (S14)$$

$$\begin{aligned} \frac{d}{dt} [T_1 @ T_2](t) &= - \left( k_{T_1 \rightarrow S_1}^{T_2} + k_{T_1 \rightarrow T_2}^{T_2} + k_{P, T_1}^{T_2} + k_{T_1, GR} \right) [T_1 @ T_2](t) \\ &+ k_{S_1 \rightarrow T_1}^{T_2} [S_1 @ T_2](t) + k_{T_2 \rightarrow T_1}^{T_2} [T_2 @ T_2](t) + k_{T_1, GD} [T_1 @ S_1 T_1](t) \end{aligned} \quad (S15)$$

$$\begin{aligned} \frac{d}{dt} [T_2 @ T_2](t) &= - \left( k_{T_2 \rightarrow S_1}^{T_2} + k_{T_2 \rightarrow T_1}^{T_2} + k_{T_2 \rightarrow S_0}^{T_2} + k_{P, T_2}^{T_2} \right) [T_2 @ T_2](t) \\ &+ k_{S_1 \rightarrow T_2}^{T_2} [S_1 @ T_2](t) + k_{T_1 \rightarrow T_2}^{T_2} [T_1 @ T_2](t) + k_{T_2, GR} [T_2 @ S_1 T_1](t) \end{aligned} \quad (S16)$$

$$\begin{aligned} \frac{d}{dt} [S_0 @ T_2](t) &= \left( k_{S_1 \rightarrow S_0}^{T_2} + k_F^{T_2} \right) [S_1 @ T_2](t) + \left( k_{T_1 \rightarrow S_0}^{T_1} + k_{P, T_1}^{T_1} \right) [T_1 @ T_2](t) \\ &+ \left( k_{T_2 \rightarrow S_0}^{T_2} + k_{P, T_2}^{T_2} \right) [T_2 @ T_2](t) \end{aligned} \quad (S17)$$

**Supplementary Table 15.** Definitions of the variables and constants in Eqs S10–17.

---

|                |                                                  |
|----------------|--------------------------------------------------|
| $[S_0@S_1T_1]$ | the population of $S_0$ at the $S_1T_1$ geometry |
| $[S_1@S_1T_1]$ | the population of $S_1$ at the $S_1T_1$ geometry |
| $[T_1@S_1T_1]$ | the population of $T_1$ at the $S_1T_1$ geometry |
| $[T_2@S_1T_1]$ | the population of $T_2$ at the $S_1T_1$ geometry |

---

|             |                                               |
|-------------|-----------------------------------------------|
| $[S_0@T_2]$ | the population of $S_0$ at the $T_2$ geometry |
| $[S_1@T_2]$ | the population of $S_1$ at the $T_2$ geometry |
| $[T_1@T_2]$ | the population of $T_1$ at the $T_2$ geometry |
| $[T_2@T_2]$ | the population of $T_2$ at the $T_2$ geometry |

---

|                                    |                                                                                                  |
|------------------------------------|--------------------------------------------------------------------------------------------------|
| $k_{S_1 \rightarrow T_1}^{S_1T_1}$ | the rate constant for the $S_1 \rightarrow T_1$ nonradiative transition at the $S_1T_1$ geometry |
| $k_{S_1 \rightarrow T_2}^{S_1T_1}$ | the rate constant for the $S_1 \rightarrow T_2$ nonradiative transition at the $S_1T_1$ geometry |
| $k_{S_1 \rightarrow S_0}^{S_1T_1}$ | the rate constant for the $S_1 \rightarrow S_0$ nonradiative decay at the $S_1T_1$ geometry      |
| $k_F^{S_1T_1}$                     | the rate constant for the $S_1 \rightarrow S_0$ radiative decay at the $S_1T_1$ geometry         |
| $k_{T_1 \rightarrow S_1}^{S_1T_1}$ | the rate constant for the $T_1 \rightarrow S_1$ nonradiative transition at the $S_1T_1$ geometry |
| $k_{T_2 \rightarrow S_1}^{S_1T_1}$ | the rate constant for the $T_2 \rightarrow S_1$ nonradiative transition at the $S_1T_1$ geometry |
| $k_{T_1 \rightarrow T_2}^{S_1T_1}$ | the rate constant for the $T_1 \rightarrow T_2$ nonradiative transition at the $S_1T_1$ geometry |
| $k_{P,T_1}^{S_1T_1}$               | the rate constant for the $T_1 \rightarrow S_0$ radiative decay at the $S_1T_1$ geometry         |
| $k_{T_2 \rightarrow T_1}^{S_1T_1}$ | the rate constant for the $T_2 \rightarrow T_1$ nonradiative transition at the $S_1T_1$ geometry |
| $k_{T_2 \rightarrow S_0}^{S_1T_1}$ | the rate constant for the $T_2 \rightarrow S_0$ nonradiative decay at the $S_1T_1$ geometry      |
| $k_{P,T_2}^{S_1T_1}$               | the rate constant for the $T_2 \rightarrow S_0$ radiative decay at the $S_1T_1$ geometry         |

---

|                                 |                                                                                               |
|---------------------------------|-----------------------------------------------------------------------------------------------|
| $k_{S_1 \rightarrow T_1}^{T_2}$ | the rate constant for the $S_1 \rightarrow T_1$ nonradiative transition at the $T_2$ geometry |
| $k_{S_1 \rightarrow T_2}^{T_2}$ | the rate constant for the $S_1 \rightarrow T_2$ nonradiative transition at the $T_2$ geometry |
| $k_{S_1 \rightarrow S_0}^{T_2}$ | the rate constant for the $S_1 \rightarrow S_0$ nonradiative decay at the $T_2$ geometry      |

|                                 |                                                                                               |
|---------------------------------|-----------------------------------------------------------------------------------------------|
| $k_F^{T_2}$                     | the rate constant for the $S_1 \rightarrow S_0$ radiative decay at the $T_2$ geometry         |
| $k_{T_1 \rightarrow S_1}^{T_2}$ | the rate constant for the $T_1 \rightarrow S_1$ nonradiative transition at the $T_2$ geometry |
| $k_{T_2 \rightarrow S_1}^{T_2}$ | the rate constant for the $T_2 \rightarrow S_1$ nonradiative transition at the $T_2$ geometry |
| $k_{T_1 \rightarrow T_2}^{T_2}$ | the rate constant for the $T_1 \rightarrow T_2$ nonradiative transition at the $T_2$ geometry |
| $k_{P,T_1}^{T_2}$               | the rate constant for the $T_1 \rightarrow S_0$ radiative decay at the $T_2$ geometry         |
| $k_{T_2 \rightarrow T_1}^{T_2}$ | the rate constant for the $T_2 \rightarrow T_1$ nonradiative transition at the $T_2$ geometry |
| $k_{T_2 \rightarrow S_0}^{T_2}$ | the rate constant for the $T_2 \rightarrow S_0$ nonradiative decay at the $T_2$ geometry      |
| $k_{P,T_2}^{T_2}$               | the rate constant for the $T_2 \rightarrow S_0$ radiative decay at the $T_2$ geometry         |
| <hr/>                           |                                                                                               |
| $k_{S_1,GR}$                    | the rate constant for the geometry relaxation in $S_1$                                        |
| $k_{T_1,GR}$                    | the rate constant for the geometry relaxation in $T_1$                                        |
| $k_{T_2,GR}$                    | the rate constant for the geometry relaxation in $T_2$                                        |
| $k_{T_1,GD}$                    | the rate constant for the energy-uphill geometry deformation in $T_1$                         |
| <hr/>                           |                                                                                               |

## Supplementary Note 1

### Assumptions in the kinetic equations

First,  $k_{ISC}(T_1 \rightarrow S_0)$  is set to be zero. Second, because the calculated energy difference between  $T_1@S_1T_1$  and  $T_1@T_2$  (55 meV) is sufficiently small, the  $T_1@S_1T_1 \rightarrow T_1@T_2$  conversion occurs more frequently than the competitive  $T_1 \rightarrow S_0$  decays. Hence, the energy-uphill  $T_1@S_1T_1 \rightarrow T_1@T_2$  conversion owing to geometry deformation (GD) is assumed to be allowed. Here, we examine the validity of this assumption. GD in  $T_1$  competes with phosphorescence. If the GD rate constant ( $k_{GD}$ ) is much larger than  $k_p$  ( $\sim 0.2 \text{ s}^{-1}$ ), GD occurs before  $T_1$  decays to  $S_0$ .  $k_{GD}$  can be expressed as  $k_{GD} = k_{GR} \times \exp(-\Delta E(T_1)/k_B T)$ , where  $k_{GR}$  is the rate constant for geometry relaxation,  $\Delta E(T_1) = 55 \text{ meV}$  is the energy difference between  $T_1@S_1T_1$  and  $T_1@T_2$  (Figure 1b),  $k_B$  is the Boltzmann constant, and  $T$  is the temperature. Even if  $k_{GR}$  is as small as  $1.00 \times 10^3 \text{ s}^{-1}$ ,  $k_{GD} = 1.17 \times 10^2 \text{ s}^{-1}$  and  $k_{GD} \gg k_p$ .  $k_{GR}$  of organic molecules is typically  $10^{12} \text{ s}^{-1}$  and hence, it is reasonable to assume that  $k_{GD} \gg k_p$  holds for DABNA-1. Here,  $k_{GR}$  is set to be  $1.00 \times 10^{12} \text{ s}^{-1}$  and  $k_{GD} = 1.17 \times 10^{11} \text{ s}^{-1}$ .

## Supplementary References

- 1 Frisch, M. J. *et al.* Gaussian 16 Rev. C.01. (2016)
- 2 Shao, Y. *et al.* Advances in molecular quantum chemistry contained in the Q-Chem 4 program package. *Mol. Phys.* **113**, 184-215 (2015).
